1 **Widespread gene duplication and adaptive evolution in the**  
2 **RNA interference pathways of the *Drosophila obscura***  
3 **group**

4 Danang Crysanto<sup>1,3\*</sup>

5 Darren J. Obbard<sup>1,2</sup>

6

7 Affiliation

8 1. Institute of Evolutionary Biology, University of Edinburgh, Charlotte  
9 Auerbach Road, Edinburgh, United Kingdom

10

11 2. Centre for Infection, Evolution and Immunity, University of Edinburgh,  
12 Edinburgh, United Kingdom

13

14 3. Present address: Animal Genomics, ETH Zurich, Zurich, Switzerland

15

16 Email

17 DC: danang.crysanto@usys.ethz.ch

18

19 DJO: darren.obbard@ed.ac.uk

20

21 \*Author for correspondence

22

23

24

25

26

27

28 **ABSTRACT**

29 **Background:** RNA interference (RNAi) related pathways provide defense against  
30 viruses and transposable elements, and have been implicated in the suppression of  
31 meiotic drive elements. Genes in these pathways often exhibit high levels of adaptive  
32 substitution, and over longer timescales show frequent gene duplication and loss—  
33 most likely as a consequence of their role in mediating conflict with these parasites.  
34 This is particularly striking for *Argonaute 2* (*Ago2*), which is ancestrally the key effector  
35 of antiviral RNAi in insects, but has repeatedly formed new testis-specific duplicates  
36 in the recent history of the *Drosophila obscura* group.

37 **Results:** Here we take advantage of publicly available genomic and transcriptomic  
38 data to identify six further RNAi-pathway genes that have duplicated in this clade of  
39 *Drosophila*, and examine their evolutionary history. As seen for *Ago2*, we observe high  
40 levels of adaptive amino-acid substitution and changes in sex-biased expression in  
41 many of the paralogs. However, our phylogenetic analysis suggests that co-  
42 duplications of the RNAi machinery were not synchronous, and our expression  
43 analysis fails to identify consistent male-specific expression.

44 **Conclusions:** These results confirm that RNAi genes, including genes of the antiviral  
45 and piRNA pathways, undergo frequent independent duplications and that their history  
46 has been particularly labile within the *Drosophila obscura* group. However, they also  
47 suggest that the selective pressures driving these changes have not been consistent,  
48 implying that more than one selective agent may be responsible.

49 **Keywords:** gene duplication, RNAi, RNA interference, adaptive evolution,  
50 neofunctionalization

51

## 52 Introduction

53 Gene duplication is an important process in molecular evolution, providing raw genetic  
54 material for evolutionary innovation. The subsequent evolutionary dynamics following  
55 gene duplication are often described in terms of two alternative models,  
56 'neofunctionalization' and 'sub-functionalization' [1]. Under neofunctionalization, the  
57 functional redundancy following duplication provides relaxed selective constraint, and  
58 allows new mutations to accumulate through genetic drift. Most such mutations will  
59 reduce the functionality of the gene (resulting in pseudogenization), but some paralogs  
60 can be selected for novel or derived functions. Under sub-functionalization, the  
61 duplicates independently accumulate mutations that allow them to specialise in a  
62 subset of ancestral functions of a pleiotropic gene. Neo-functionalization leads to  
63 asymmetrical evolutionary rates among paralogs (with faster evolution in paralogs that  
64 gain derived function), whereas equal rates are expected for the latter [2]. It has been  
65 suggested that both processes have played an important role in the rapid evolution of  
66 RNA interference-related pathways, including the long- and short-term evolutionary  
67 history of the Argonautes, the effectors of RNAi [3–5].

68 The RNAi-related pathways comprise a range of small-RNA mechanisms best known  
69 for their roles in mediating the control of gene expression, antiviral responses, and  
70 defence against mobile genetic elements (respectively: the miRNA pathway; Dicer-1  
71 and Argonaute-1 in insects [6]; the siRNA pathway; Dcr-2 and Argonaute 2 in insects  
72 [7]; and the piRNA pathway; piwi-family Argonaute AGO3 and Piwi/Aub in insects [8,  
73 9]). In addition, RNAi-related pathways have been implicated in a variety of biological  
74 processes, such as the control of dosage compensation [10–12] and the suppression  
75 of genetic drive [13–18], among others. Several genes involved in the defensive piRNA

76 and siRNA pathways, but not the miRNA pathway, display elevated rates of adaptive  
77 protein evolution. This is best studied in *Drosophila* [19–21], but is also detectable in  
78 other insects [22]. It has been hypothesised that this is a consequence of parasite-  
79 mediated ‘arms-race’ coevolution [20, 23], either through conflict with parasite-  
80 encoded immune suppressors—as widely seen in RNA viruses [24]— or in the case  
81 of the piRNA pathway, through selection for ‘re-tuning’ suppression mechanisms [25].  
82 Adaptive evolution of RNAi pathways is also partly reflected in the gain, loss, and  
83 functional divergence of Argonaute-family duplications [26]. For example, within the  
84 Drosophilidae—an important model for RNAi-related pathways of animals—Piwi has  
85 been duplicated in the lineages leading to *Phortica variegata* and *Scaptodrosophila*  
86 *deflexa* [3], and *Ago2* has been duplicated in those leading to *S. deflexa*, *D. willistoni*,  
87 *D. melanogaster* (where only one paralog remains – the canonical *Ago2*) and *D.*  
88 *pseudoobscura* [4]. This is particularly striking in the *Drosophila obscura* species  
89 group, which has experienced at least 6 independent duplications of *Ago2* over the  
90 last 20 million years, with all but one of the resulting duplicates becoming testis-  
91 specific, and most displaying evidence of recent and/or ongoing positive selection [4].  
92 Very recently it has been noted that several accessory components of the siRNA and  
93 piRNA pathways have also been duplicated in *D. pseudoobscura*, including  
94 *armitage*, *asterix*, *cutoff*, *maelstrom*, *tejas* and *vreteno* [22]. In *D. melanogaster*, these  
95 proteins are engaged in a number of roles in the piRNA pathway (**Table 1**). Here we  
96 use publicly available data to reconfirm the history and expression of *Ago2* in the  
97 *obscura* group, and to test whether duplications in the other genes also show male-  
98 specific expression, whether they are contemporaneous with those of *Ago2*, and  
99 whether they too show strong signatures of adaptive protein evolution. We find no  
100 clear pattern of these duplications being coincident with *Ago2* duplications, but both

101 *asterix* and *cutoff* duplications display increased sexual dimorphism relative to their  
102 ancestral copies, through decreased female expression. In addition, several of the  
103 gene duplicates show evidence of adaptive protein evolution in *D. pseudoobscura*,  
104 including both copies of *cutoff*, the ancestral copy of *asterix*, and the new duplicates  
105 of *tejas*, *maelstrom* and *vreteno*.

## 106 RESULTS

### 107 **Obscura group *Argonaute 2* are duplicated and show male-biased expression**

108 The *Drosophila obscura* group has experienced multiple duplications of *Ago2* and it  
109 has previously been shown that these are associated with positive selection and testis-  
110 specific expression [4]. Here we reanalyzed the expression patterns and evolutionary  
111 history of these genes using publicly available RNAseq and genomic data, additionally  
112 including newly available genomic sequences from *D. algonquin*, *D. athabasca*, *D.*  
113 *bifasciata* and *D. miranda*. In contrast to the previous qPCR analysis that failed to  
114 identify strong expression of the ancestral copy in *D. pseudoobscura* (*Ago2d* [4]), we  
115 found that all the *Ago2* homologs in *D. pseudoobscura* were detectable at a high level  
116 in RNAseq data, and that that all show significant male-bias (**Figure 1**). The *Ago2d*  
117 expression detected here is unlikely to be an artefact of cross-mapping between  
118 paralogs as we observed the reads that mapped uniquely across the gene. The male  
119 bias was largest for *Ago2e*, where expression in males is approximately 1000-fold  
120 higher than females (pMCMC<0.001; **Figure 1**), and smallest in *Ago2c* and the  
121 ancestral copy *Ago2d*, consistent with the *ca.* two-fold enrichment of the single copy  
122 of *Ago2* in male *D. melanogaster*. We also confirmed that *D. miranda*, a close relative  
123 of *D. pseudoobscura* that has not previously been analyzed, displayed a qualitatively  
124 similar pattern among those paralogs represented (**Figure 1**). In *D. obscura* and we

125 found the ancestral copy (*Ago2a*) again showed slightly, but marginally significantly,  
126 higher expression in males (pMCMC=-0.014), but that other *Ago2* proteins showed a  
127 strong male biased expression, with the largest effect for *Ago2f*, where male  
128 expression was 2000-fold higher (**Figure 1**; pMCMC<0.001).

129 **Six piRNA pathway genes are duplicated, and *asterix* and *cutoff* duplicates show**  
130 **increased male-bias in their expression**

131 Palmer *et al.* [22] recently identified six accessory piRNA pathway genes that have  
132 also experienced duplication in the obscura group (**Additional file 1 Table S1**). We  
133 could locate the duplicates for all genes in *D. pseudoobscura*, except for *armitage*  
134 where we instead identified a duplicate in the affinis subgroup but not in the obscura  
135 or subobscura subgroups. Where new chromosomal locations could be determined  
136 by synteny in *D. pseudoobscura*, we found that *cutoff*, *maelstrom* and *vreteno* were  
137 duplicated from an autosome to the X chromosome, *asterix* duplicated from the X  
138 chromosome to an autosome, and *tejas* duplicated between autosomal locations. Two  
139 duplicates (*asterix* and *tejas*) lack introns, suggesting they are retro-transcribed copies  
140 created through an mRNA intermediate.

141 Using public RNAseq data from *D. pseudoobscura*, *D. miranda*, and *D. obscura*, we  
142 found that all of the gene duplicates were expressed (**Figure 2**). *Armitage*, which was  
143 not duplicated within the newly examined lineages for which RNAseq data were  
144 available, did not show strong sex-biased expression. Similarly, *tejas*, *maelstrom*, and  
145 *vreteno* were not strongly differentially expressed between the sexes, and nor were  
146 their duplicates in *D. pseudoobscura* and *D. miranda*. In contrast, both *asterix* and  
147 *cutoff* duplicates displayed substantially reduced expression in females and slightly  
148 increased expression in males (**Figure 2**). For example, as previously reported from

149 qPCR analysis [27] the paralog of *asterix* in *D. pseudoobscura* displays ca. 1000-fold  
150 higher expression in males than females. In both *D. pseudoobscura* and *D. miranda*,  
151 those genes with overall strongly increased male-biased expression (*Argonaute 2*,  
152 *asterix*, *cutoff*, and their paralogs) had the highest expression in testis, and had  
153 reduced their expression in ovaries (**Additional file 2 Figure S1**).

### 154 **Adaptive amino-acid substitutions are generally more common in the** 155 **duplicates**

156 Using population genetic data from *D. pseudoobscura*, and *D. miranda* as an  
157 outgroup, we used the McDonald-Kreitman framework and a maximum-likelihood  
158 extension to estimate the rate of adaptive substitution in protein sequences, and to  
159 test whether this was different between the ancestral and duplicated copies [28, 29].  
160 Treating genes individually, we found evidence for positive selection acting on at least  
161 one paralog for each of the genes except *asterix* and *Ago2c* ( $p < 0.05$ ; **Additional file**  
162 **3 Table S2**). Among the ancestral copies, only *cutoff* displayed evidence of positive  
163 selection. We then tested whether the paralogs generally showed a different pattern  
164 of selection to the ancestral copies by dividing the genes into two classes (6 ancestral  
165 copies and 8 paralogs) and comparing the likelihood of models that allowed the  
166 classes to differ in the adaptive rate  $\alpha$  (**Table 2**) [29]. The best supported model  
167 allowed  $\alpha$  to differ between ancestral and duplicate copies (Akaike weight: 0.81), and  
168 the second best supported model was that in which  $\alpha=0$  for the ancestral copies  
169 (Akaike weight: 0.19), providing overall evidence that the paralogs have experienced  
170 more adaptive protein evolution. In the best-supported model, the  $\alpha$  was estimated to  
171 be 0.68 for the duplicate group, which more than three times larger than the ancestral  
172 group (0.20). In case segregating weakly-deleterious variants had led to a downward  
173 bias in estimates of  $\alpha$ , we repeated this analysis excluding all alleles with a minor allele

174 frequency <0.125 [30], although this reduced power to the extent that few genes  
175 remained individually significant (**Additional file 6 Table S3**). We also repeated the  
176 analysis with a larger dataset PRJNA326536 [31] (**Additional file 6 Table S3**), and  
177 obtained qualitatively similar results ( $R^2=0.946$  for  $\alpha$  estimate between the analyses;  
178 the second dataset, while larger, is less suitable for analysis as only the third  
179 chromosome is a direct sample from a wild population).

### 180 **Gene duplications were unlikely to be contemporaneous**

181 Given the multiple duplications of *Ago2* and the piRNA pathway components in the  
182 *obscura* group, we hypothesized that some duplications may have occurred near-  
183 simultaneously, duplicating whole components of a pathway together. We therefore  
184 used relaxed-clock phylogenetic methods to estimate the relative timings of each  
185 duplication. In agreement with the previous analysis of *Ago2* [4], we found that the  
186 duplications giving rise to *Ago2e* and *Ago2f* predated the split between the *obscura*  
187 and *pseudoobscura* subgroups, with a subsequent loss of *Ago2f* from the  
188 *pseudoobscura* subgroup (**Figure 3**). In contrast, we found that duplications in five of  
189 the other six genes unambiguously occurred after the *obscura/pseudoobscura* split,  
190 with the timing of duplication in *maelstrom* being uncertain. Briefly, *armitage* displayed  
191 a single duplication shared by members of the *affinis* subgroup, *asterix* and *tejas* a  
192 single duplication each in the lineage leading to *D. pseudoobscura* (which were  
193 subsequently lost in the *affinis* subgroup), *cutoff* a single duplication recently in the  
194 *pseudoobscura* subgroup, and *vreteno* a single duplication at the base of the *obscura*  
195 group (**Figure 4**). For *maelstrom*, the maximum clade credibility tree suggests  
196 duplication occurred very slightly prior to this split, followed by subsequent loss of one  
197 paralog the *obscura* subgroup (**Figure 4**). However, this was poorly supported, and  
198 similar pattern to the others genes may be more parsimonious. We used the posterior



199 distributions of split times, relative to the divergence time of the *obscura* and  
200 *pseudoobscura* subgroups, to infer whether or not duplications occurred at  
201 approximately the same time (**Figure 5**). Although the small amount of information  
202 available from single genes made relative timings highly uncertain, it is clear that few  
203 of the *Ago2* duplications could have been concurrent with the piRNA-pathway  
204 duplications (**Additional file 5 Figure S2**). However, the recent and rapid duplications  
205 within the piRNA could have been concurrent, with *vreteno*, *tejas*, *maelstrom* and  
206 *asterix* not differing significantly, all having duplicated very close to the split between  
207 *D. obscura* and *D. pseudoobscura* (posterior overlap >0.1 in each case; **Additional**  
208 **file 5 Figure S2**).

## 209 **DISCUSSION**

210 Although four of the six piRNA pathway duplicates did not display altered tissue  
211 specificity compared to the ancestral copy, *asterix* and *cutoff* both became significantly  
212 more male biased, as did each of the *Ago2* duplicates [4]; **Figure 1, Figure 2**). In each  
213 case, this was due to higher (or exclusive) expression in the testis. The duplicated  
214 genes also showed higher rates of adaptive amino acid substitution, together and  
215 individually, whereas only two (*asterix* and *armitage*) displayed evidence of positive  
216 selection when single-copy in *D. melanogaster* (**Additional file 6 Table S3**).

217 This new tissue specificity and the rapid evolution of duplicated copies broadly suggest  
218 that gene duplication in these pathways may be associated with functional  
219 diversification through neofunctionalization, for example by testis-specific selective  
220 pressure. Three main selective pressures seem likely candidates to have driven this.  
221 First, given the role of *Ago2* in antiviral defense in *Drosophila* [7], and the role of the  
222 piRNA pathway in antiviral defense in mosquitoes [32], it is possible that these

223 duplications have specialized to a virus that is active in the male germline, such as *D.*  
224 *obscura* and *D. affinis* Sigmaviruses [33]. Second, given the role of all of these genes  
225 in the suppression of transposable elements (TEs), their evolution may have been  
226 shaped by the invasion of TEs that are more active in testis, as seen for Penelope [34]  
227 and copia [35]. Such a ‘duplication arms-race’ in response to TE invasion is thought  
228 to occur in mammals, where repeated duplications of KRAB-ZNF family are selected  
229 following the invasion of novel TEs, and subsequently provide defence [36, 37].  
230 Alternatively, duplicates may quantitatively enhance the pre-existing response to TEs,  
231 as suggested for another rapidly-evolving piRNA-pathway component, Rhino [38].

232 The third, and arguably most compelling hypothesis, is that selection is mediated by  
233 conflict with meiotic drive elements, such as sex ratio distorting X-chromosomes [39,  
234 40]. Most directly, meiotic drive elements are common in *Drosophila*, and RNAi-related  
235 pathways have been widely implicated in their action and suppression [15, 16, 18]. In  
236 addition, sex-chromosome drive is widespread in the *Drosophila obscura* group. X  
237 chromosome drive was first described in *D. obscura*, and has also been reported in  
238 *pseudoobscura*, *persimilis*, *affinis*, *azteca*, *subobscura* and *athabasca* [39] and is  
239 mediated through a testis-specific function (Y-bearing sperm have reduced function).  
240 Finally, a testis-specific class of hairpin (endo) siRNAs is required for male fertility in  
241 *D. melanogaster* [41], testes-restricted clustered miRNAs show rapid evolutionary  
242 turnover and are represented in large numbers in *D. pseudoobscura* [42], and  
243 suppression of sex-specific duplicates of S-Lap1 via a small-RNA mechanism has very  
244 recently been implicated in the meiotic drive mechanism of *D. pseudoobscura* [17]. In  
245 this context, it is also interesting to note that *Ago2* is involved in directing  
246 heterochromatin formation in *Drosophila* dosage compensation [10–12], and that in *D.*

247 *melanogaster* the sex-ratio distorting *Spiroplasma* achieves male-killing through the  
248 disruption of dosage compensation, although this acts at the embryonic stage [43].  
249 Nevertheless, in the absence of mechanistic studies, this remains highly speculative.  
250 Testis is generally more permissive to gene expression and testis-specific expression  
251 may be a transient state (i.e. the “Out of Testis Hypothesis” [44]). In addition, the  
252 application of MK-like analyses to paralogs is inherently flawed [1], as the MK  
253 framework implicitly assumes that the selective regime has been consistent across all  
254 (group and outgroup) sequences analyzed. If gene duplicates experience an early but  
255 transient period of relaxed constraint, a high proportion of the amino-acid fixations may  
256 have occurred as a result of genetic drift that is no longer detectable from current  
257 patterns of polymorphism.

## 258 **Methods**

### 259 **Sequence collation and paralog identification**

260 The full-length sequences for 7 RNA interference genes; *armitage* (*armi*), *asterix* (*arx*),  
261 *cutoff* (*cuff*), *tejas* (*tej*), *vreteno* (*vret*), *maelstrom* (*mael*), and *Argonaute 2* (*Ago2*) from  
262 12 *obscura* group species were identified using tBLASTn (BLAST+ 2.6.0) [45] with a  
263 local BLAST database (see below for the details of the construction of local genomic  
264 database). Known gene sequences from *D. pseudoobscura* and *D. melanogaster*  
265 were used as a query with a stringent e-value threshold (1e-40). Genes were inferred  
266 to have been duplicated when BLAST indicated that there were multiple full-length hits  
267 located in different genomic regions. The sequences were manually inspected, introns  
268 removed and the coding frame identified using Bioedit v 7.2 [46]. Genes in *D.*  
269 *pseudoobscura* were classified as ancestral or duplicate copies based on the syntenic

270 orthology with *D. melanogaster* using Flybase Genome Browser [47]. High quality  
271 genomes are not available for other members of the obscura groups, and in those  
272 cases ancestral/derived status was assigned based on homology with *D.*  
273 *pseudoobscura*. To provide a comprehensive overview of the evolution of the RNAi  
274 paralogs, we included 24 *Drosophila* species outside of *obscura* group with assembled  
275 genomes already available in public databases. The Flybase and NCBI tblastn online  
276 portal were used to identify the target genes with queries from *D. melanogaster* or  
277 closely related species.

278 Five obscura group species had assembled genomes at the time of this study: *D.*  
279 *pseudoobscura* (assembly Dpse\_3.0 [48]), *D. miranda* (assembly DroMir\_2.2 [49]  
280 [50]), *D. persimilis* (assembly dper\_caf1 [51]), *D. affinis* (*Drosophila affinis* Genome  
281 Release 1.0 [52]) and *D. lowei* (*Drosophila lowei* Genome Release 1.0 [52, 53]) and  
282 in these cases the genome was directly used for local BLAST database. For four  
283 species (*D. obscura*, *D. subobscura*, *D. subsilvestris*, *D. tristis*) we used de novo  
284 assembled transcriptomes based on paired RNA-seq reads data from wild-collected  
285 males [54] (Accession: PRJNA312496). Assembly was performed using Trinity [55]  
286 with '--trimmomatic' and otherwise default parameters, and the assembled  
287 transcriptome was searched locally using BLAST. For three other species: *D.*  
288 *athabasca*, *D. Algonquin* [56] (Accession: PRJNA274695) and *D. bifasciata*  
289 (Accession: PRJDB4817), only unassembled genomic reads were available. For these  
290 species we applied a targeted assembly approach as follows: (i) reads that had local  
291 similarity with all known duplicated RNAi proteins were identified using Diamond [57]  
292 with relaxed e-value of 1; (ii) hits from Diamond were then retained and used for  
293 assembly using Spades v3.10.1 [58]; and (iii) scaffolds produced by Spades were then  
294 used as references in local BLAST database.

## 295 **Phylogenetic analysis and the relative timing of duplications**

296 Bayesian relaxed clock trees were used to infer the evolutionary relationship among  
297 paralogs. First, the sequences were aligned as translated nucleotide in Clustal W [59]  
298 with default parameters. Regions with ambiguous alignment were identified and  
299 removed manually by eye. A total of 7 gene trees were then inferred using Beast v1.7.0  
300 [60]. Inference used a relaxed clock model with an uncorrelated lognormal distribution  
301 among branches, and an HKY substitution model with empirical base frequencies and  
302 rate variation among sites was modelled as a gamma distribution with four categories.  
303 The site model allowed for third codon position to have different substitution model  
304 from the other positions.

305 The trees were scaled by setting the time to most recent common ancestor of the *D.*  
306 *obscura* group to have lognormal distribution with a data-scale mean of 1, and a very  
307 small standard deviation of 0.01. This had the advantage of scaling all duplications to  
308 the same relative timescale, while allowing different genes and different paralogs to  
309 vary in their rate. To record the posterior ages of duplication, we specified the ancestral  
310 and duplicated genes as a distinct taxon set. The Monte Carlo Markov Chain analysis  
311 was run for at least 100 million states and posterior sample was recorded every 10000  
312 states. Log files were then inspected in Tracer v1.6 [61] for parameter stationarity, and  
313 adequate sampling as indicated by an effective sample size over 200. Finally, 25% of  
314 initial trees were discarded as burn-in, and maximum clade credibility trees were  
315 summarized using Tree Annotator. Parameter MCMC files were processed using a  
316 custom R script [62] to infer the posterior distribution the age of duplication for each  
317 gene and to quantify the degree overlapping between these age distributions.

318

## 319 **Differential expression analysis of the duplicated RNAi genes**

320 For this analysis, we used obscura group transcriptome datasets available in EBI ENA  
321 (European Nucleotide Archive, <http://www.ebi.ac.uk/ena>) and DDBJ (DNA DataBank  
322 of Japan, <http://www.ddbj.nig.ac.jp/>) that included the sex and tissue annotation. The  
323 datasets comprised 163, 42 and 34 RNA-seq datasets of *D. pseudoobscura*, *D.*  
324 *miranda* and *D. obscura* respectively; Bioproject: DRA004463, PRJEB1227 [63],  
325 PRJNA226598, PRJNA219224 [64], PRJNA326536 [31], PRJNA74723,  
326 PRJNA321079, PRJNA291085 [65], PRJNA268967 [66]. Since our main interest was  
327 the comparison expression between sex, but not its absolute expression value, we a  
328 performed a simple read-counting analysis. In outline, each RNA-seq dataset was  
329 mapped to the full-length CDS using Bowtie2 v2.3.2 [67] with mode ‘--very sensitive’  
330 and otherwise default parameters. The reads mapped to reference were counted  
331 using combination of SAMtools view flag -F 4 and SAMtools idxstats v1.4 [68]. The  
332 count data were then normalized by gene length and read depth, where it was then  
333 scaled relative to the expression of RpL32. To determine the statistical significance of  
334 difference gene expression, generalised linear mixed models were fitted using R  
335 package MCMCglmm [69] with sex as fixed effect and tissue as a random effect, and  
336 log-transformed normalised expression as the response variable. The natural  
337 logarithm transformation ( $\log_e$ ) was used to reduce the skewness of the distributions.  
338 To allow for zero value for non-expressed genes, the genes with read count 0 was  
339 replaced with 1.

$$340 \quad \mathbf{Y} \sim \boldsymbol{\mu} + \mathbf{sex} + \mathbf{tissue}(\mathbf{random}) + \boldsymbol{\varepsilon}$$

341 Where Y is  $\log_e$  transformed normalized expression data (response variable),  $\mu$  is  
342 mean of  $\log_e$  transformed expression and  $\varepsilon$  is residual error. The random effects

343 (tissue) and the residual were assumed to be distributed multivariate normal with mean  
344 0 and uncorrelated covariance matrix  $MVN(0, I\sigma^2)$ . Sex was modelled as a factor with  
345 2 variables (male-female) and tissue contained 13 variables of different tissue.

## 346 **Population Genetic Analysis of the RNAi Duplicated Genes**

347 We used the McDonald-Kreitman test [28] to compare the rate of adaptive evolution  
348 between ancestral and duplicate genes using polymorphism data from publicly-  
349 available sequencing datasets: Pseudobase (12 strains of *pseudoobscura*, Accession  
350 list: SRP007802 [53]) and 12 strains *D. miranda* (Bioproject: PRJNA277849 [70]).

351 Genomic reads for each strain were mapped to the genomic reference using Bowtie2  
352 with '--very-sensitive' mode and otherwise default parameters and reads mapped to  
353 the genes of interest were extracted using SAMtools view (flag -F 4). Duplicate reads  
354 were marked using MarkDuplicates (Picard Tools [71]). To reduce the excessive  
355 variants surrounding indel, we then applied GATK IndelRealigner [71], which discards  
356 the original mapping and performs local-realignment around indel. The output was  
357 then sorted and indexed and the BAM file was used for 'mpileup' variant calling  
358 (SAMtools v1.4 [72]). The output VCF files were then filtered to only include SNP  
359 (GATK SelectVariants [71]), and variants that were covered by less than five reads  
360 were masked with 'N' (undetermined bases, --snpmask GATK v3.5 [71]). The variant  
361 files were then converted to FASTA format using GATK  
362 FastaAlternateReferenceMaker, which replaced genomic reference with variants  
363 defined in VCF files [73] and output the heterozygous calls with IUPAC ambiguous  
364 code. Finally, FastPHASE [74] was used to generate pseudo-haplotypes, although  
365 haplotype information was not utilized by the analysis.

366 MK tests were performed for each gene on *D. pseudoobscura-D miranda*. DNAsp v5.0  
367 [75] was used to estimate the statistics for the MK test and Fisher's exact test was  
368 used to calculate the statistical significance for single-gene analyses. Genes were  
369 then grouped into ancestral and duplicate genes, and a cross-gene analysis was  
370 performed using a maximum likelihood extension of the MK test [29]. Five different  
371 models were fitted that differed in the constraint of  $\alpha$  (proportion of non-synonymous  
372 substitutions estimated to be adaptive), and the relative support between models was  
373 compared using Akaike Weights.

#### 374 **List of Abbreviations**

375 **Ago2**: Agronaute 2 **armi**: armitage **arx**: asterix **BAM**: Binary Alignment Map **BLAST**:  
376 Basic Alignment Search Tool **cuff**: cutoff **GATK**: Genome Analysis Toolkit **HKY**:  
377 Hasegawa, Kishino and Yano model **mael**: maelstrom **MCMC**: Monte Carlo Markov  
378 Chain **MK**: McDonald-Kreitman test **RNAi**: RNA interference **SNP**: Single Nucleotide  
379 Polymorphism **TE**: Transposable Elements **tej**: tejas **VCF**: Variant Call Format **vret**:  
380 vreteno

#### 381 **Declarations**

#### 382 **Ethics approval and consent to participate**

383 Not applicable

#### 384 **Consent to publication**

385 Not applicable

#### 386 **Availability of data and material**

387 Fasta alignment (both for phylogenetic and MK analysis) and raw expression data are  
388 available via Figshare (DOI: 10.6084/m9.figshare.7145720).



389 **Competing interests**

390 The authors declare that they have no competing interests.

391 **Funding**

392 DC was financially supported by a Master's Training Scholarship from the Indonesian  
393 Endowment Fund for Education (LPDP) and the University of Edinburgh School of  
394 Biological Science Bursary for MSc in Quantitative Genetics and Genome Analysis.

395 **Authors' contributions**

396 DJO and DC conceived the study and designed the analysis, DC analyzed the data  
397 and wrote the first draft of the manuscript. Both authors read and approved the final  
398 manuscript.

399 **Acknowledgements**

400 We thank Billy Palmer for initial discussion on the variant calling, and Billy Palmer and  
401 Samuel Lewis for comments on an earlier version of this manuscript. We thank the  
402 many people who made their published data publicly available, and Shu Kondo for  
403 permission to use unpublished data from *D. bifasciata*.

## 404 References

- 405 1. Hahn MW. Distinguishing Among Evolutionary Models for the Maintenance of Gene  
406 Duplicates. *J Hered.* 2009;100:605–17. doi:10.1093/jhered/esp047.
- 407 2. Innan H, Kondrashov F. The evolution of gene duplications: classifying and distinguishing  
408 between models. *Nat Rev Genet.* 2010;11:97–108. doi:10.1038/nrg2689.
- 409 3. Lewis SH, Salmela H, Obbard DJ. Duplication and diversification of dipteran argonaute  
410 genes, and the evolutionary divergence of Piwi and Aubergine. *Genome Biol Evol.*  
411 2016;8:507–18.
- 412 4. Lewis SH, Webster CL, Salmela H, Obbard DJ. Repeated duplication of Argonaute2 is  
413 associated with strong selection and testis specialization in *Drosophila*. *Genetics.*  
414 2016;204:757–69.
- 415 5. Singh RK, Gase K, Baldwin IT, Pandey SP. Molecular evolution and diversification of the  
416 Argonaute family of proteins in plants. *BMC Plant Biol.* 2015;15:23. doi:10.1186/s12870-014-  
417 0364-6.
- 418 6. Vidigal JA, Ventura A. The biological functions of miRNAs: lessons from in vivo studies.  
419 *Trends Cell Biol.* 2015;25:137–47. doi:10.1016/j.tcb.2014.11.004.
- 420 7. Bronkhorst AW, van Rij RP. The long and short of antiviral defense: small RNA-based  
421 immunity in insects. *Curr Opin Virol.* 2014;7:19–28. doi:10.1016/J.COVIRO.2014.03.010.
- 422 8. Czech B, Hannon GJ. One Loop to Rule Them All: The Ping-Pong Cycle and piRNA-  
423 Guided Silencing. *Trends Biochem Sci.* 2016;41:324–37. doi:10.1016/j.tibs.2015.12.008.
- 424 9. Lewis SH, Quarles KA, Yang Y, Tanguy M, Frézal L, Smith SA, et al. Pan-arthropod  
425 analysis reveals somatic piRNAs as an ancestral defence against transposable elements.  
426 *Nat Ecol Evol.* 2018;2:174–81. doi:10.1038/s41559-017-0403-4.
- 427 10. Menon DU, Meller VH. A role for siRNA in X-chromosome dosage compensation in  
428 *Drosophila melanogaster*. *Genetics.* 2012;191:1023–8. doi:10.1534/genetics.112.140236.
- 429 11. Tang W, Seth M, Tu S, Shen E-Z, Li Q, Shirayama M, et al. A Sex Chromosome piRNA  
430 Promotes Robust Dosage Compensation and Sex Determination in *C. elegans*. *Dev Cell.*  
431 2018;44:762–770.e3. doi:10.1016/j.devcel.2018.01.025.
- 432 12. Deshpande N, Meller VH. Chromatin That Guides Dosage Compensation Is Modulated  
433 by the siRNA Pathway in *Drosophila melanogaster*. *Genetics.* 2018;209:1085–97.  
434 doi:10.1534/genetics.118.301173.
- 435 13. Tao Y, Masly JP, Araripe L, Ke Y, Hartl DL. A sex-ratio Meiotic Drive System in  
436 *Drosophila simulans*. I: An Autosomal Suppressor. *PLoS Biol.* 2007;5:e292.  
437 doi:10.1371/journal.pbio.0050292.
- 438 14. Tao Y, Araripe L, Kingan SB, Ke Y, Xiao H, Hartl DL. A sex-ratio Meiotic Drive System in  
439 *Drosophila simulans*. II: An X-linked Distorter. *PLoS Biol.* 2007;5:e293.  
440 doi:10.1371/journal.pbio.0050293.
- 441 15. Gell SL, Reenan RA. Mutations to the piRNA pathway component aubergine enhance  
442 meiotic drive of segregation distorter in *Drosophila melanogaster*. *Genetics.* 2013;193:771–  
443 84. doi:10.1534/genetics.112.147561.
- 444 16. Aravin AA, Klenov MS, Vagin V V, Bantignies F, Cavalli G, Gvozdev VA. Dissection of a  
445 natural RNA silencing process in the *Drosophila melanogaster* germ line. *Mol Cell Biol.*  
446 2004;24:6742–50. doi:10.1128/MCB.24.15.6742-6750.2004.

- 447 17. Ellison C, Leonard C, Landeen E, Gibilisco L, Phadnis N, Bachtrog D. Rampant cryptic  
448 sex chromosome drive in *Drosophila*. doi:10.1101/324368.
- 449 18. Lin C-J, Hu F, Dubruille R, Smibert P, Loppin B, Correspondence ECL. The  
450 hpRNA/RNAi Pathway Is Essential to Resolve Intragenomic Conflict in the *Drosophila* Male  
451 Germline. 2018. doi:10.1016/j.devcel.2018.07.004.
- 452 19. Obbard DJ, Jiggins FM, Halligan DL, Little TJ. Natural selection drives extremely rapid  
453 evolution in antiviral RNAi genes. *Curr Biol*. 2006;16:580–5.
- 454 20. Obbard DJ, Gordon KHJ, Buck AH, Jiggins FM. The evolution of RNAi as a defence  
455 against viruses and transposable elements. *Philos Trans R Soc Lond B Biol Sci*.  
456 2009;364:99–115. doi:10.1098/rstb.2008.0168.
- 457 21. Kolaczkowski B, Hupalo DN, Kern AD. Recurrent Adaptation in RNA Interference Genes  
458 Across the *Drosophila* Phylogeny. *Mol Biol Evol*. 2011;28:1033–42.  
459 doi:10.1093/molbev/msq284.
- 460 22. Palmer WH, Hadfield JD, Obbard DJ. RNA-Interference Pathways Display High Rates of  
461 Adaptive Protein Evolution in Multiple Invertebrates. *Genetics*. 2018;208:1585–99.  
462 doi:10.1534/genetics.117.300567.
- 463 23. Marques JT, Carthew RW. A call to arms: coevolution of animal viruses and host innate  
464 immune responses. *Trends Genet*. 2007;23:359–64. doi:10.1016/J.TIG.2007.04.004.
- 465 24. van Mierlo JT, Overheul GJ, Obadia B, van Cleef KWR, Webster CL, Saleh M-C, et al.  
466 Novel *Drosophila* Viruses Encode Host-Specific Suppressors of RNAi. *PLoS Pathog*.  
467 2014;10:e1004256. doi:10.1371/journal.ppat.1004256.
- 468 25. Blumenstiel JP, Erwin AA, Hemmer LW. What drives positive selection in the *Drosophila*  
469 piRNA machinery? The genomic autoimmunity hypothesis. *Yale J Biol Med*. 2016;89:499–  
470 512. <http://www.ncbi.nlm.nih.gov/pubmed/28018141>. Accessed 24 Jul 2017.
- 471 26. Dowling D, Pauli T, Donath A, Meusemann K, Podsiadlowski L, Petersen M, et al.  
472 Phylogenetic Origin and Diversification of RNAi Pathway Genes in Insects. *Genome Biol*  
473 *Evol*. 2017;1:evw281. doi:10.1093/gbe/evw281.
- 474 27. Meisel RP, Hilldorfer BB, Koch JL, Lockton S, Schaeffer SW. Adaptive Evolution of  
475 Genes Duplicated from the *Drosophila pseudoobscura* neo-X Chromosome. *Mol Biol Evol*.  
476 2010;27:1963–78. doi:10.1093/molbev/msq085.
- 477 28. McDonald JH, Kreitman M. Adaptive protein evolution at the *Adh* locus in *Drosophila*.  
478 *Nature*. 1991;351:652–654. doi:10.1038/350055a0.
- 479 29. Welch JJ. Estimating the genomewide rate of adaptive protein evolution in *Drosophila*.  
480 *Genetics*. 2006;173:821–37. doi:10.1534/genetics.106.056911.
- 481 30. Charlesworth J, Eyre-Walker A. The McDonald-Kreitman Test and Slightly Deleterious  
482 Mutations. *Mol Biol Evol*. 2008;25:1007–15. doi:10.1093/molbev/msn005.
- 483 31. Fuller ZL, Haynes GD, Richards S, Schaeffer SW. Genomics of Natural Populations:  
484 How Differentially Expressed Genes Shape the Evolution of Chromosomal Inversions in  
485 *Drosophila pseudoobscura*. *Genetics*. 2016;204:287–301. doi:10.1534/genetics.116.191429.
- 486 32. Campbell CL, Black WC, Hess AM, Foy BD. Comparative genomics of small RNA  
487 regulatory pathway components in vector mosquitoes. *BMC Genomics*. 2008;9:425.  
488 doi:10.1186/1471-2164-9-425.
- 489 33. Longdon B, Wilfert L, Obbard DJ, Jiggins FM. Rhabdoviruses in two species of  
490 *Drosophila*: Vertical transmission and a recent sweep. *Genetics*. 2011;188:141–50.  
491 doi:10.1534/genetics.111.127696.

- 492 34. Rozhkov N V., Aravin AA, Zelentsova ES, Schostak NG, Sachidanandam R, McCombie  
493 WR, et al. Small RNA-based silencing strategies for transposons in the process of invading  
494 *Drosophila* species. *RNA*. 2010;16:1634–45. doi:10.1261/rna.2217810.
- 495 35. Pasyukova, S. Nuzhdin, W. Li E, Nuzhdin S, Li W, Flavell AJ. Germ line transposition of  
496 the copia retrotransposon in *Drosophila melanogaster* is restricted to males by tissue-  
497 specific control of copia RNA levels. *Mol Gen Genet MGG*. 1997;255:115–24.  
498 doi:10.1007/s004380050479.
- 499 36. Thomas JH, Schneider S. Coevolution of retroelements and tandem zinc finger genes.  
500 *Genome Res*. 2011;21:1800–12. doi:10.1101/gr.121749.111.
- 501 37. Jacobs FMJ, Greenberg D, Nguyen N, Haeussler M, Ewing AD, Katzman S, et al. An  
502 evolutionary arms race between KRAB zinc-finger genes ZNF91/93 and SVA/L1  
503 retrotransposons. *Nature*. 2014;516:242–5. doi:10.1038/nature13760.
- 504 38. Levine MT, Wende Vander HM, Hsieh E, Baker EP, Malik HS. Recurrent gene  
505 duplication diversifies genome defense repertoire in *Drosophila*. *Mol Biol*. 2016;33:1–13.
- 506 39. Jaenike J. Sex Chromosome Meiotic Drive. *Annu Rev Ecol Syst*. 2001;32:25–49.  
507 doi:10.1146/annurev.ecolsys.32.081501.113958.
- 508 40. Lindholm AK, Dyer KA, Firman RC, Fishman L, Forstmeier W, Holman L, et al. The  
509 Ecology and Evolutionary Dynamics of Meiotic Drive. *Trends Ecol Evol*. 2016;31:315–26.  
510 doi:10.1016/J.TREE.2016.02.001.
- 511 41. Wen J, Duan H, Bejarano F, Okamura K, Fabian L, Brill JA, et al. Adaptive regulation of  
512 testis gene expression and control of male fertility by the *Drosophila* hairpin RNA pathway.  
513 [Corrected]. *Mol Cell*. 2015;57:165–78. doi:10.1016/j.molcel.2014.11.025.
- 514 42. Mohammed J, Flynt AS, Panzarino AM, Mondal MMH, DeCruz M, Siepel A, et al. Deep  
515 experimental profiling of microRNA diversity, deployment, and evolution across the  
516 *Drosophila* genus. *Genome Res*. 2018;28:52–65. doi:10.1101/gr.226068.117.
- 517 43. Harumoto T, Anbutsu H, Lemaitre B, Fukatsu T. Male-killing symbiont damages host's  
518 dosage-compensated sex chromosome to induce embryonic apoptosis. *Nat Commun*.  
519 2016;7:12781. doi:10.1038/ncomms12781.
- 520 44. Kaessmann H. Origins, evolution, and phenotypic impact of new genes. *Genome Res*.  
521 2010;20:1313–26. doi:10.1101/gr.101386.109.
- 522 45. Altschul SF, Gish W, Miller W, Myers EW, Lipman DJ. Basic local alignment search tool.  
523 *J Mol Biol*. 1990;215:403–10. doi:10.1016/S0022-2836(05)80360-2.
- 524 46. Hall Thomas. BioEdit: a user-friendly biological sequence alignment editor and analysis  
525 program for Windows 95/95/NT. Oxford Univ. 1999;41:95–8. doi:citeulike-article-id:691774.
- 526 47. St. Pierre SE, Ponting L, Stefancsik R, McQuilton P. FlyBase 102—advanced  
527 approaches to interrogating FlyBase. *Nucleic Acids Res*. 2014;42:D780–8.  
528 doi:10.1093/nar/gkt1092.
- 529 48. English AC, Richards S, Han Y, Wang M, Vee V, Qu J, et al. Mind the Gap: Upgrading  
530 Genomes with Pacific Biosciences RS Long-Read Sequencing Technology. *PLoS One*.  
531 2012;7:e47768. doi:10.1371/journal.pone.0047768.
- 532 49. Alekseyenko AA, Ellison CE, Gorchakov AA, Zhou Q, Kaiser VB, Toda N, et al.  
533 Conservation and de novo acquisition of dosage compensation on newly evolved sex  
534 chromosomes in *Drosophila*. *Genes Dev*. 2013;27:853–8. doi:10.1101/gad.215426.113.
- 535 50. Zhou Q, Bachtrog D. Sex-specific adaptation drives early sex chromosome evolution in  
536 *Drosophila*. *Science* (80- ). 2012;337:341–5. doi:10.1126/science.1225385.

- 537 51. Drosophila 12 Genomes Consortium AG, Clark AG, Eisen MB, Smith DR, Bergman CM,  
538 Oliver B, et al. Evolution of genes and genomes on the Drosophila phylogeny. *Nature*.  
539 2007;450:203–18. doi:10.1038/nature06341.
- 540 52. Palmieri N, Kosiol C, Schlotterer C. The life cycle of Drosophila orphan genes. *Elife*.  
541 2014;3:e01311. doi:10.7554/eLife.01311.
- 542 53. McGaugh SE, Heil CSS, Manzano-Winkler B, Loewe L, Goldstein S, Himmel TL, et al.  
543 Recombination Modulates How Selection Affects Linked Sites in Drosophila. *PLoS Biol*.  
544 2012;10:e1001422. doi:10.1371/journal.pbio.1001422.
- 545 54. Webster CL, Waldron FM, Robertson S, Crowson D, Ferrari G, Quintana JF, et al. The  
546 Discovery, Distribution, and Evolution of Viruses Associated with *Drosophila melanogaster*.  
547 *PLOS Biol*. 2015;13:e1002210. doi:10.1371/journal.pbio.1002210.
- 548 55. Grabherr MG, Haas BJ, Yassour M, Levin JZ, Thompson DA, Amit I, et al. Full-length  
549 transcriptome assembly from RNA-Seq data without a reference genome. *Nat Biotechnol*.  
550 2011;29:644–52.
- 551 56. Wong Miller KM, Bracewell RR, Eisen MB, Bachtrog D. Patterns of Genome-Wide  
552 Diversity and Population Structure in the *Drosophila athabasca* Species Complex. *Mol Biol*  
553 *Evol*. 2017. doi:10.1093/molbev/msx134.
- 554 57. Buchfink B, Xie C, Huson DH. Fast and sensitive protein alignment using DIAMOND. *Nat*  
555 *Methods*. 2014;12:59–60. doi:10.1038/nmeth.3176.
- 556 58. Nurk S, Bankevich A, Antipov D, Gurevich A, Korobeynikov A, Lapidus A, et al.  
557 Assembling genomes and mini-metagenomes from highly chimeric reads. In: *Lecture Notes*  
558 *in Computer Science (including subseries Lecture Notes in Artificial Intelligence and Lecture*  
559 *Notes in Bioinformatics)*. Springer, Berlin, Heidelberg; 2013. p. 158–70. doi:10.1007/978-3-  
560 642-37195-0\_13.
- 561 59. Thompson JD, Higgins DG, Gibson TJ. CLUSTAL W: Improving the sensitivity of  
562 progressive multiple sequence alignment through sequence weighting, position-specific gap  
563 penalties and weight matrix choice. *Nucleic Acids Res*. 1994;22:4673–80.  
564 doi:10.1093/nar/22.22.4673.
- 565 60. Drummond AJ, Rambaut A. BEAST: Bayesian evolutionary analysis by sampling trees.  
566 *BMC Evol Biol*. 2007;7:214. doi:10.1186/1471-2148-7-214.
- 567 61. Rambaut A. Tracer v1.6. <http://tree.bio.ed.ac.uk/software/tracer/>. 2013.
- 568 62. R Core Team. R: A language and environment for statistical computing. R Foundation  
569 for Statistical Computing, Vienna, Austria. 2016. <https://www.r-project.org/>.
- 570 63. Chen Z-X, Sturgill D, Qu J, Jiang H, Park S, Boley N, et al. Comparative validation of the  
571 *D. melanogaster* modENCODE transcriptome annotation. *Genome Res*. 2014;24:1209–23.  
572 doi:10.1101/gr.159384.113.
- 573 64. VanKuren NW, Vibranovski MD. A novel dataset for identifying sex-biased genes in  
574 *Drosophila*. *J genomics*. 2014;2:64–7. doi:10.7150/jgen.7955.
- 575 65. Nyberg KG, Machado CA. Comparative Expression Dynamics of Intergenic Long  
576 Noncoding RNAs in the Genus *Drosophila*. *Genome Biol Evol*. 2016;8:1839–58.  
577 doi:10.1093/gbe/evw116.
- 578 66. Gomes S, Civetta A. Hybrid male sterility and genome-wide misexpression of male  
579 reproductive proteases. *Sci Rep*. 2015;5:11976. doi:10.1038/srep11976.
- 580 67. Langmead B, Trapnell C, Pop M, Salzberg SL. Ultrafast and memory-efficient alignment  
581 of short DNA sequences to the human genome. *Genome Biol*. 2009;10:R25. doi:10.1186/gb-



- 582 2009-10-3-r25.
- 583 68. Li H, Handsaker B, Wysoker A, Fennell T, Ruan J, Homer N, et al. The Sequence  
584 Alignment/Map format and SAMtools. *Bioinformatics*. 2009;25:2078–9.  
585 doi:10.1093/bioinformatics/btp352.
- 586 69. Hadfield JD. MCMC Methods for Multi-Response Generalized Linear Mixed Models: The  
587 MCMCglmm R Package. *J Stat Softw*. 2010;33:1–22. doi:10.18637/jss.v033.i02.
- 588 70. Smukowski Heil CS, Ellison C, Dubin M, Noor MAF. Recombining without Hotspots: A  
589 Comprehensive Evolutionary Portrait of Recombination in Two Closely Related Species of  
590 *Drosophila*. *Genome Biol Evol*. 2015;7:2829–42. doi:10.1093/gbe/evv182.
- 591 71. Van der Auwera GA, Carneiro MO, Hartl C, Poplin R, del Angel G, Levy-Moonshine A, et  
592 al. From fastQ data to high-confidence variant calls: The genome analysis toolkit best  
593 practices pipeline. *Curr Protoc Bioinforma*. 2013; SUPPL.43:11.10.1-11.10.33.  
594 doi:10.1002/0471250953.bi1110s43.
- 595 72. Li H. A statistical framework for SNP calling, mutation discovery, association mapping  
596 and population genetical parameter estimation from sequencing data. *Bioinformatics*.  
597 2011;27:2987–93. doi:10.1093/bioinformatics/btr509.
- 598 73. Danecek P, Auton A, Abecasis G, Albers CA, Banks E, DePristo MA, et al. The variant  
599 call format and VCFtools. *Bioinformatics*. 2011;27:2156–8.  
600 doi:10.1093/bioinformatics/btr330.
- 601 74. Scheet P, Stephens M. A Fast and Flexible Statistical Model for Large-Scale Population  
602 Genotype Data: Applications to Inferring Missing Genotypes and Haplotypic Phase. *Am J*  
603 *Hum Genet Am J Hum Genet*. 2006;7878:629–44. [www.ajhg.org](http://www.ajhg.org). Accessed 17 Jul 2017.
- 604 75. Librado P, Rozas J. DnaSP v5: a software for comprehensive analysis of DNA  
605 polymorphism data. *Bioinformatics*. 2009;25:1451–2. doi:10.1093/bioinformatics/btp187.
- 606 76. Leader DP, Krause SA, Pandit A, Davies SA, Dow JAT. FlyAtlas 2: a new version of the  
607 *Drosophila melanogaster* expression atlas with RNA-Seq, miRNA-Seq and sex-specific data.  
608 *Nucleic Acids Res*. 2018;46:D809–15. doi:10.1093/nar/gkx976.
- 609 77. Mohn F, Sienski G, Handler D, Brennecke J. The Rhino-Deadlock-Cutoff Complex  
610 Licenses Noncanonical Transcription of Dual-Strand piRNA Clusters in *Drosophila*. *Cell*.  
611 2014;157:1364–79. doi:10.1016/j.cell.2014.04.031.
- 612 78. Zamparini AL, Davis MY, Malone CD, Vieira E, Zavadil J, Sachidanandam R, et al.  
613 Vreteno, a gonad-specific protein, is essential for germline development and primary piRNA  
614 biogenesis in *Drosophila*. *Development*. 2011;138:4039–50. doi:10.1242/dev.069187.
- 615 79. Saito K, Ishizu H, Komai M, Kotani H, Kawamura Y, Nishida KM, et al. Roles for the Yb  
616 body components Armitage and Yb in primary piRNA biogenesis in *Drosophila*. *Genes Dev*.  
617 2010;24:2493–8. doi:10.1101/gad.1989510.
- 618 80. Vourekas A, Zheng K, Fu Q, Maragkakis M, Alexiou P, Ma J, et al. The RNA helicase  
619 MOV10L1 binds piRNA precursors to initiate piRNA processing. *Genes Dev*. 2015;29:617–  
620 29. doi:10.1101/gad.254631.114.
- 621 81. Patil VS, Kai T. Repression of Retroelements in *Drosophila* Germline via piRNA Pathway  
622 by the Tudor Domain Protein Tejas. *Curr Biol*. 2010;20:724–30.  
623 doi:10.1016/j.cub.2010.02.046.
- 624 82. Ohtani H, Iwasaki YW, Shibuya A, Siomi H, Siomi MC, Saito K. DmGTSF1 is necessary  
625 for Piwi-piRISC-mediated transcriptional transposon silencing in the *Drosophila* ovary.  
626 *Genes Dev*. 2013;27:1656–61. doi:10.1101/gad.221515.113.

- 627 83. Dönertas D, Sienski G, Brennecke J. Drosophila Gtsf1 is an essential component of the  
628 Piwi-mediated transcriptional silencing complex. *Genes Dev.* 2013;27:1693–705.  
629 doi:10.1101/gad.221150.113.
- 630 84. Sato K, Siomi MC. Functional and structural insights into the piRNA factor Maelstrom.  
631 *FEBS Lett.* 2015;589:1688–93. doi:10.1016/j.febslet.2015.03.023.
- 632 85. Li WH. Unbiased estimation of the rates of synonymous and nonsynonymous  
633 substitution. *Journal of Molecular Evolution.* 1993;36:96–9. doi:10.1007/BF02407308.
- 634

## Figures

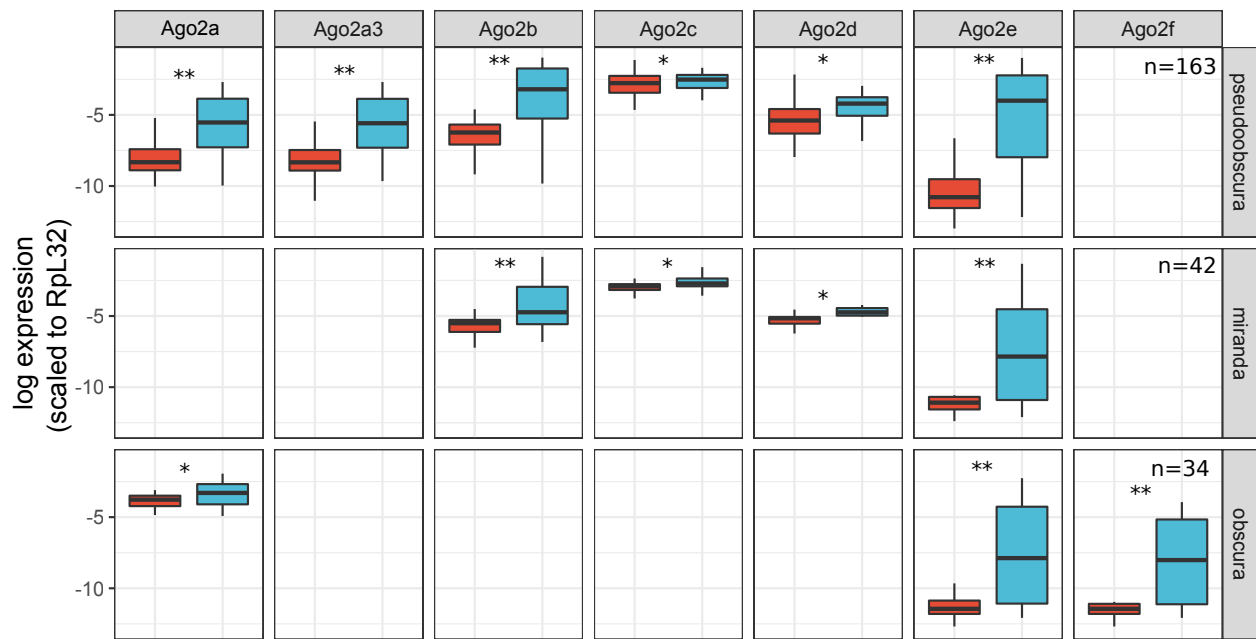

**Figure 1 Expression Profile of Argonaute 2**

Plots show the difference in expression between female (red) and male (blue) flies, based on public RNAseq data, normalized to rpL32 and plotted on a natural log scale. The significance of differences between the sexes was assessed using a linear model fitted with MCMCglmm and is denoted by asterisks: \* 0.001 < pMCMC < 0.05; \*\* pMCMC <= 0.001). Sample size (n) represents the number of RNAseq datasets used (combined across tissues). *Ago2d* is the ancestral copy in *Dpse* and *Dmir*, *Ago2a* is the ancestral copy in *D. obscura* and *Ago2a* is recently duplicated in *Dpse* become *Ago2a1* (*Ago2a*) and *Ago2a3*.



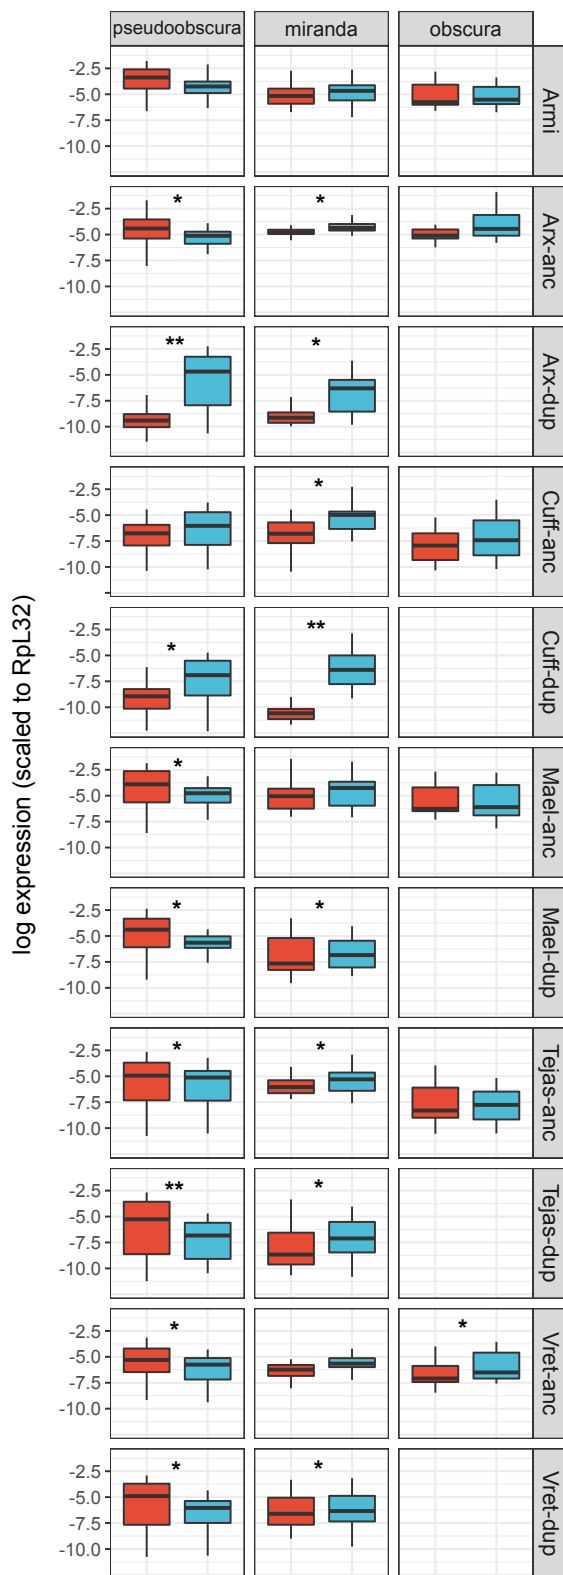

**Figure 2 The expression profile of RNAi-accessory protein genes**

Plots show the expression pattern between sex (male: blue, female:red) for genes other than *Ago2*; 'anc' ancestral copy, 'dup' duplicate copy as inferred by synteny. The y-axis is the natural log of normalized expression. The significance between sexes is denoted by \* (0.001 < pMCMC < 0.05) and \*\* (pMCMC < 0.001). Sample sizes are the same as **Figure 1**.

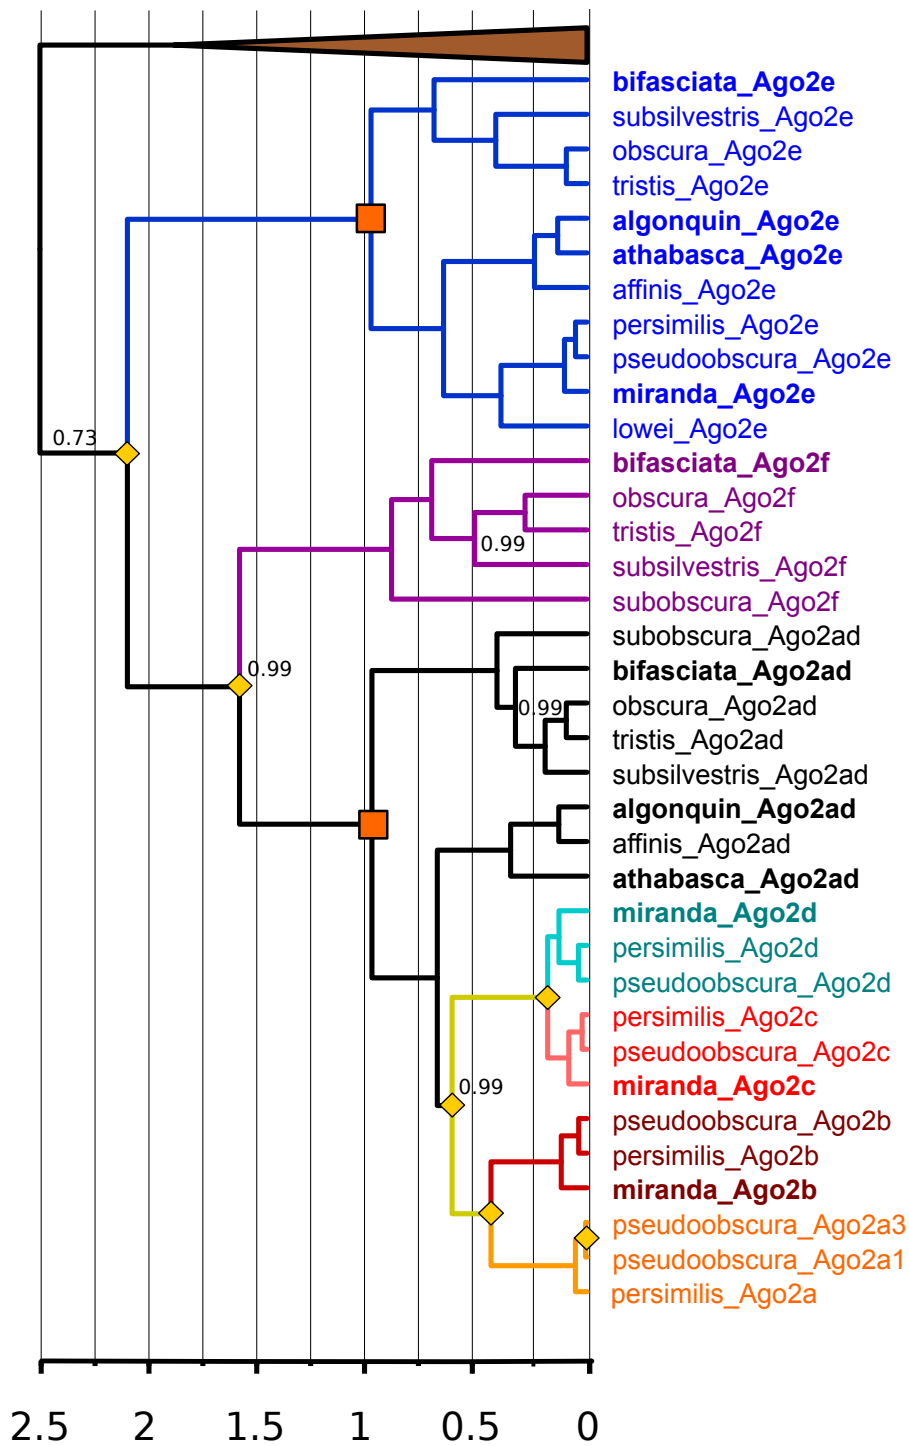

**Figure 3 Bayesian Relaxed Clock Gene Tree for Argonaute2**

The duplication events are marked by yellow diamonds, species other than the obscura group are collapsed (brown triangle), and paralog clades are colored. Bayesian posterior supports are only shown for the nodes with support less than 1. Genes not previously included in the analysis of [4] are marked in bold. Time is expressed relative to the split between the obscura and subobscura subgroups (orange boxes), which was constrained to be 1 using a strongly informative prior.

#### **Figure 4 Bayesian Relaxed Clock Trees for 6 RNAi accessory protein genes**

Ancestral genes are marked by bold blue, duplicates in bold red. Yellow diamonds indicate duplication events. Species other than *obscura* group are collapsed (green triangle; melanogaster group and brown triangle: other *Drosophila* species). Posterior Bayesian Supports are only shown in the nodes with support less than 1. Duplicated genes which could not be assigned as ancestral or duplicate is marked by \_1 or \_2. Scale axis is in the time relative to the *obscura* speciation, which was set to 1.

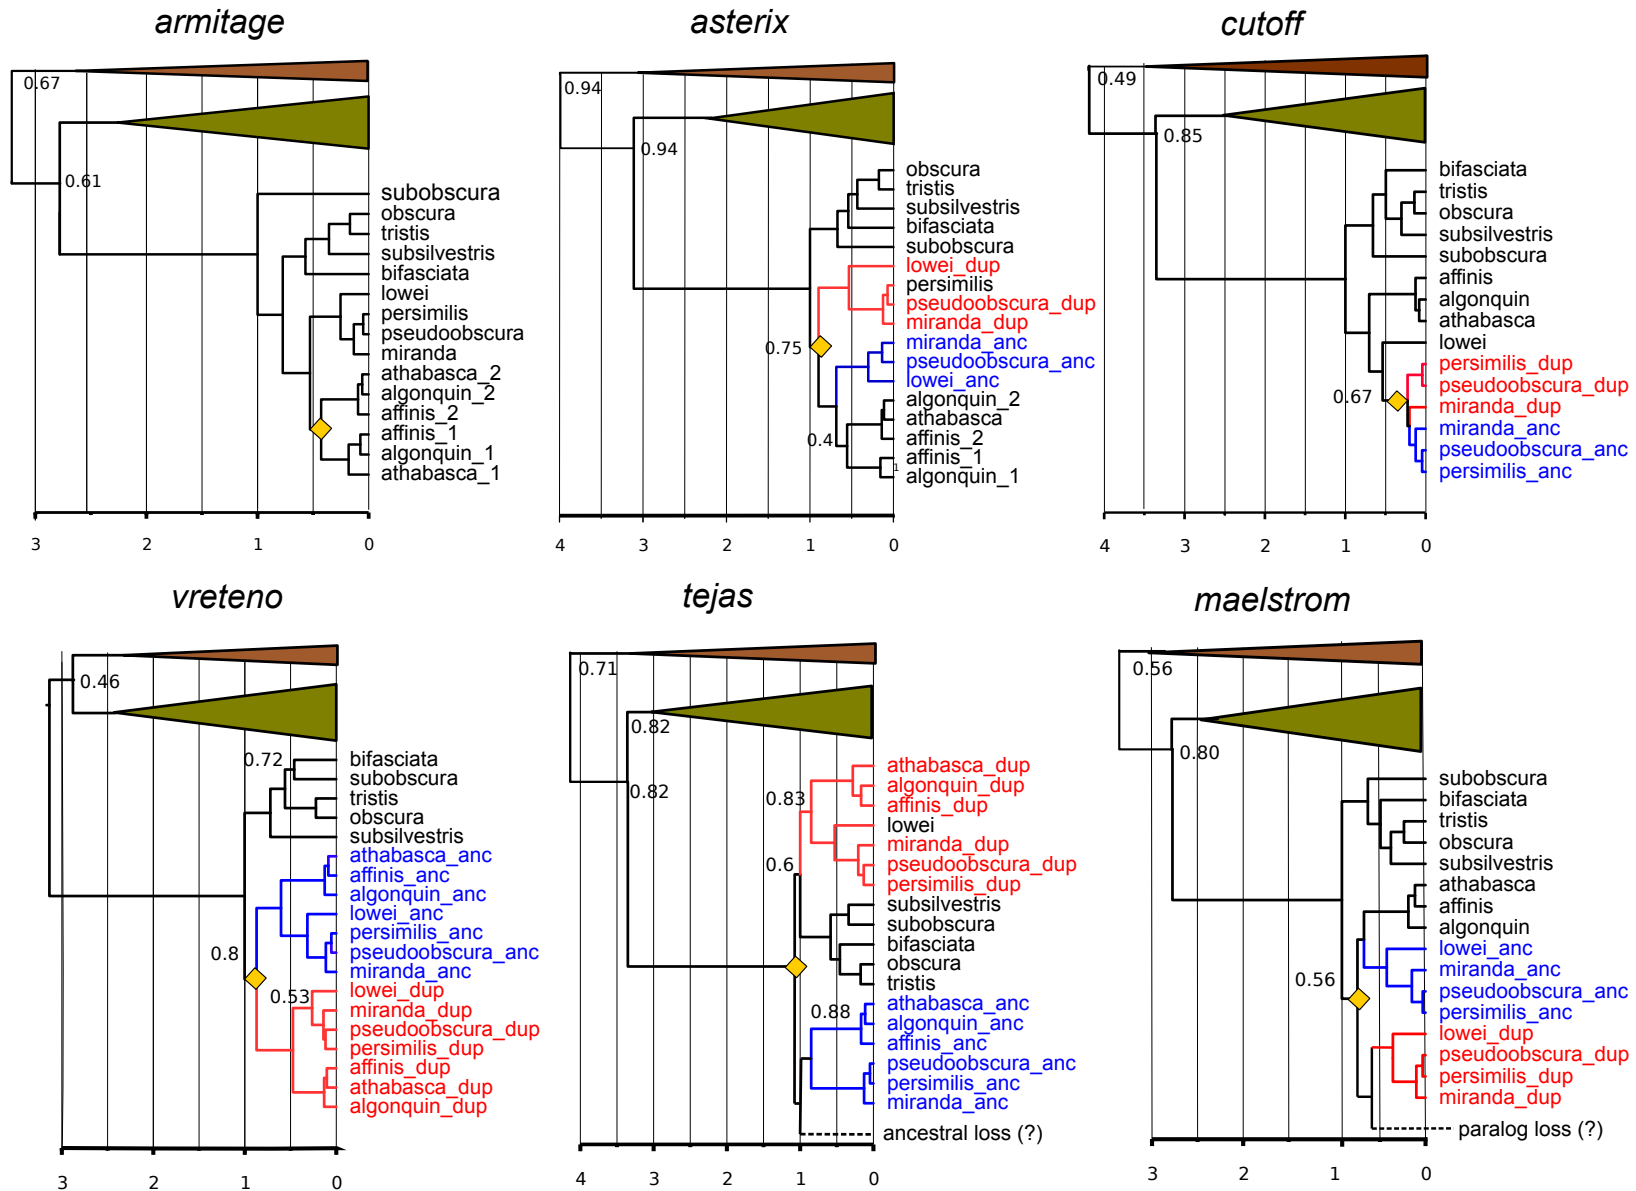

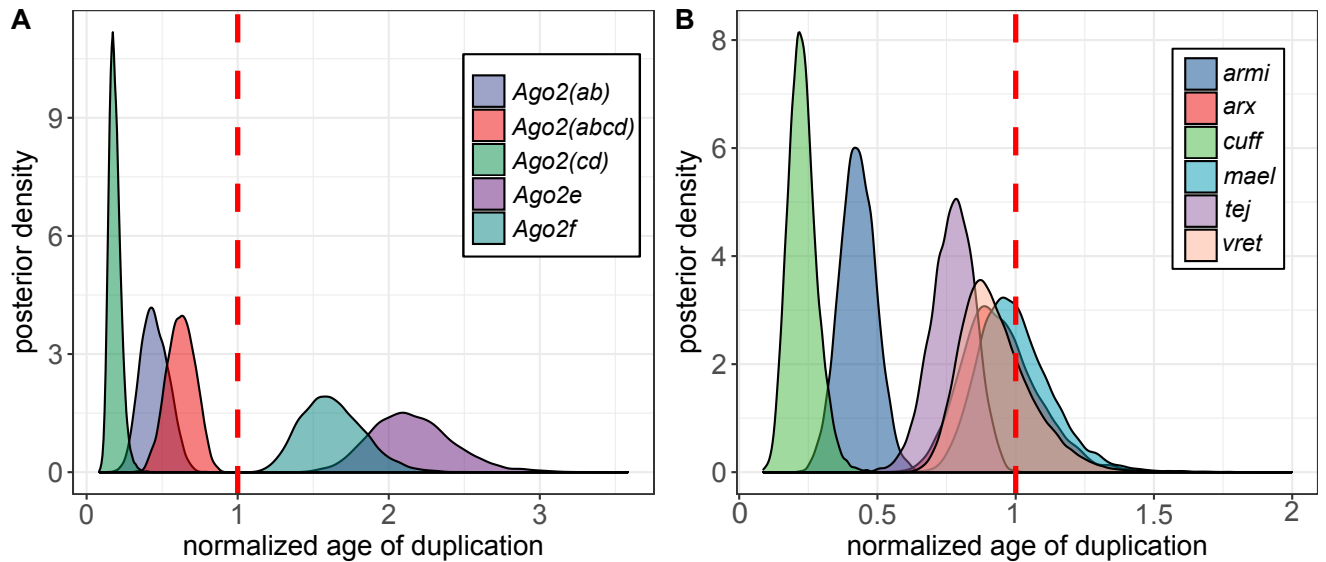

**Figure 5 Density plot for posterior distributions of the duplication age**

The MCMC posterior of the age of duplication node after 25% burn-in. **(A)** *Argounate 2* and **(B)** RNAi accessory proteins. The broken red line denotes speciation event in *obscura* group which was normalised to be 1.

## Tables

**Table 1 The details of RNAi accessory genes duplicated in the obscura group as reported by Palmer *et al.* [22]**

\*The tissue gene expression in *Dmel* is based on the FlyAtlas2 [76]. We report tissues with enrichment > 0.4.

| Gene                                | Involvement in piRNA pathway                 | Function of the protein product                                                                                                                                                             | Tissue expression in <i>Dmel</i>                             | Reference    |
|-------------------------------------|----------------------------------------------|---------------------------------------------------------------------------------------------------------------------------------------------------------------------------------------------|--------------------------------------------------------------|--------------|
| <i>cutoff</i><br>( <i>cuff</i> )    | piRNA transcription                          | Forms a complex with Rhino-Deadlock-Cutoff (Rhi-Del-Cuff) to protect uncapped non-canonical (dual-strand cluster) piRNA transcript from degradation, splicing and transcription termination | testis                                                       | [77]         |
| <i>vreteno</i><br>( <i>vret</i> )   | piRNA biogenesis                             | A Tudor-domain protein which essential for an early primary piRNA processing                                                                                                                | larval brain, adult female salivary gland, ovary, testis     | [78]         |
| <i>armitage</i><br>( <i>armi</i> )  | piRNA biogenesis                             | A RNA helicase which unwinds the piRNA intermediates before loading into Piwi                                                                                                               | ubiquitously expressed                                       | [79]<br>[80] |
| <i>tejas</i><br>( <i>tej</i> )      | Secondary piRNA production (Ping-pong cycle) | A Tudor-domain protein which physically interact with <i>Vas</i> , <i>Spn-E</i> and <i>Aub</i> for a proper ping-pong cycle in the <i>nuage</i>                                             | testis, accessory glands, adult female salivary gland, ovary | [81]         |
| <i>asterix</i><br>( <i>arx</i> )    | TGS (Transcriptional Gene Silencing)         | A zinc-finger protein which directly interacts with Piwi to scan and identify the transposon transcriptions as target for histone modifications                                             | ubiquitously expressed                                       | [82]<br>[83] |
| <i>maelstrom</i><br>( <i>mael</i> ) | TGS                                          | Act downstream of Piwi to establish histone modification and prevent the spreading of the silencing marker to the surrounding genes                                                         | brain, testis, adult female salivary gland, ovary            | [84]         |

**Table 2 Joint estimates of adaptive evolution across genes**

Maximum-likelihood extension of MK test model fitted with different constraints on  $\alpha$  [29]. LnL is the log likelihood of the model, AIC is the Akaike Information Criterion with corresponding relative probability as Akaike Weight ( $w_i$ ). The most supported model is in bold.

| Model     | Model description                                                                                                                      | LnL             | AICc            | Akaike weight( $w_i$ ) | Maximum likelihood $\alpha$ estimate |              |
|-----------|----------------------------------------------------------------------------------------------------------------------------------------|-----------------|-----------------|------------------------|--------------------------------------|--------------|
|           |                                                                                                                                        |                 |                 |                        | ancestral                            | duplicate    |
| M0        | $\alpha\text{-anc}=0, \alpha\text{-dup}=0$                                                                                             | -300.61         | 633.2207        | $4.00 \times 10^{-12}$ | 0                                    | 0            |
| M1        | $\alpha\text{-anc} > 0, \alpha\text{-dup} > 0$<br>$\alpha\text{-anc} = \alpha\text{-dup}$                                              | -284.105        | 602.2092        | $2.6 \times 10^{-05}$  | 0.539                                | 0.539        |
| M2        | $\alpha\text{-anc} > 0, \alpha\text{-dup} = 0$                                                                                         | -301.857        | 637.7133        | $5.10 \times 10^{-13}$ | 0.047                                | 0            |
| M3        | $\alpha\text{-anc} = 0, \alpha\text{-dup} > 0$                                                                                         | -275.249        | 584.4975        | 0.186                  | 0                                    | 0.618        |
| <b>M4</b> | <b><math>\alpha\text{-anc} &gt; 0, \alpha\text{-dup} &gt; 0</math></b><br><b><math>\alpha\text{-anc} \neq \alpha\text{-dup}</math></b> | <b>-272.774</b> | <b>581.5471</b> | <b>0.813</b>           | <b>0.2</b>                           | <b>0.676</b> |

## Additional files

### Additional file 1 Table S1

File format: xlsx

Title: **The detailed RNAi genes and its duplicate in *D. pseudoobscura***

Description: The genomic position is based on the *D. pseudoobscura* assembly 3.0

| Gene             | Flybase ID  | Locus Tag | Chromosomal location | Muller Element | Start Position | Gene length | Duplication mechanism  |
|------------------|-------------|-----------|----------------------|----------------|----------------|-------------|------------------------|
| Armi             | FBgn0246685 | GA25304   | 4_group1             | D              | 981803         | 3507        |                        |
| Arx-ancestral    | FBgn0077765 | GA17756   | XR_group8            | D              | 6958861        | 495         |                        |
| Arx-duplicate    | FBgn0247462 | GA26086   | 4_group3             | B              | 10387204       | 501         | Retrotransposition     |
| Cuff-ancestral   | FBgn0246456 | GA25073   | 3                    | C              | 17023607       | 1113        |                        |
| Cuff-duplicate   | FBgn0244163 | GA22760   | XL_group1a           | A              | 3011154        | 1119        | Direct DNA duplication |
| Tejas-ancestral  | FBgn0081173 | GA21185   | 3                    | C              | 17440474       | 1782        |                        |
| Tejas-duplicate  | FBgn0248235 | GA26863   | 2                    | E              | 1079477        | 1413        | Retrotransposition     |
| Vret-ancestral   | FBgn0078422 | GA18420   | 2                    | E              | 6266048        | 2085        |                        |
| Vret-duplicate   | FBgn0244928 | GA23527   | XL_group1e           | A              | 10126307       | 2110        |                        |
| Mael-ancestral   | FBgn0248264 | GA26892   | 2                    | E              | 54104          | 1314        |                        |
| Mael-duplicate   | FBgn0249827 | GA28467   | XR_group8            | D              | 396866         | 1113        | Direct DNA duplication |
| Ago2a            | FBgn0249477 | GA28114   | Unknown_group_265    |                | 16703          | 2008        | Direct DNA duplication |
| Ago2b            | FBgn0248821 | GA27454   | 2                    | E              | 23856171       | 2940        | Direct DNA duplication |
| Ago2c            | FBgn0248778 | GA27411   | 2                    | E              | 21862037       | 2915        | Direct DNA duplication |
| Ago2d(ancestral) | FBgn0245029 | GA23629   | XR_group6            | D              | 200896         | 2839        |                        |
| Ago2e            | FBgn0247385 | GA23629   | 4_group3             | B              | 6716295        | 2285        | Direct DNA duplication |



## Additional file 2 Figure S1

File format: pdf

Title: **The expression profile of RNAi across tissue**

Description: The normalized expression plotted across tissues. The error bars denote the standard error for the given tissue. Blue bar indicates male and female is indicated by red bar. The plot is shown for *D. pseudoobscura* (n=163), *D. miranda* (n=42) and *D. obscura* (n=34), respectively.



*D. miranda*

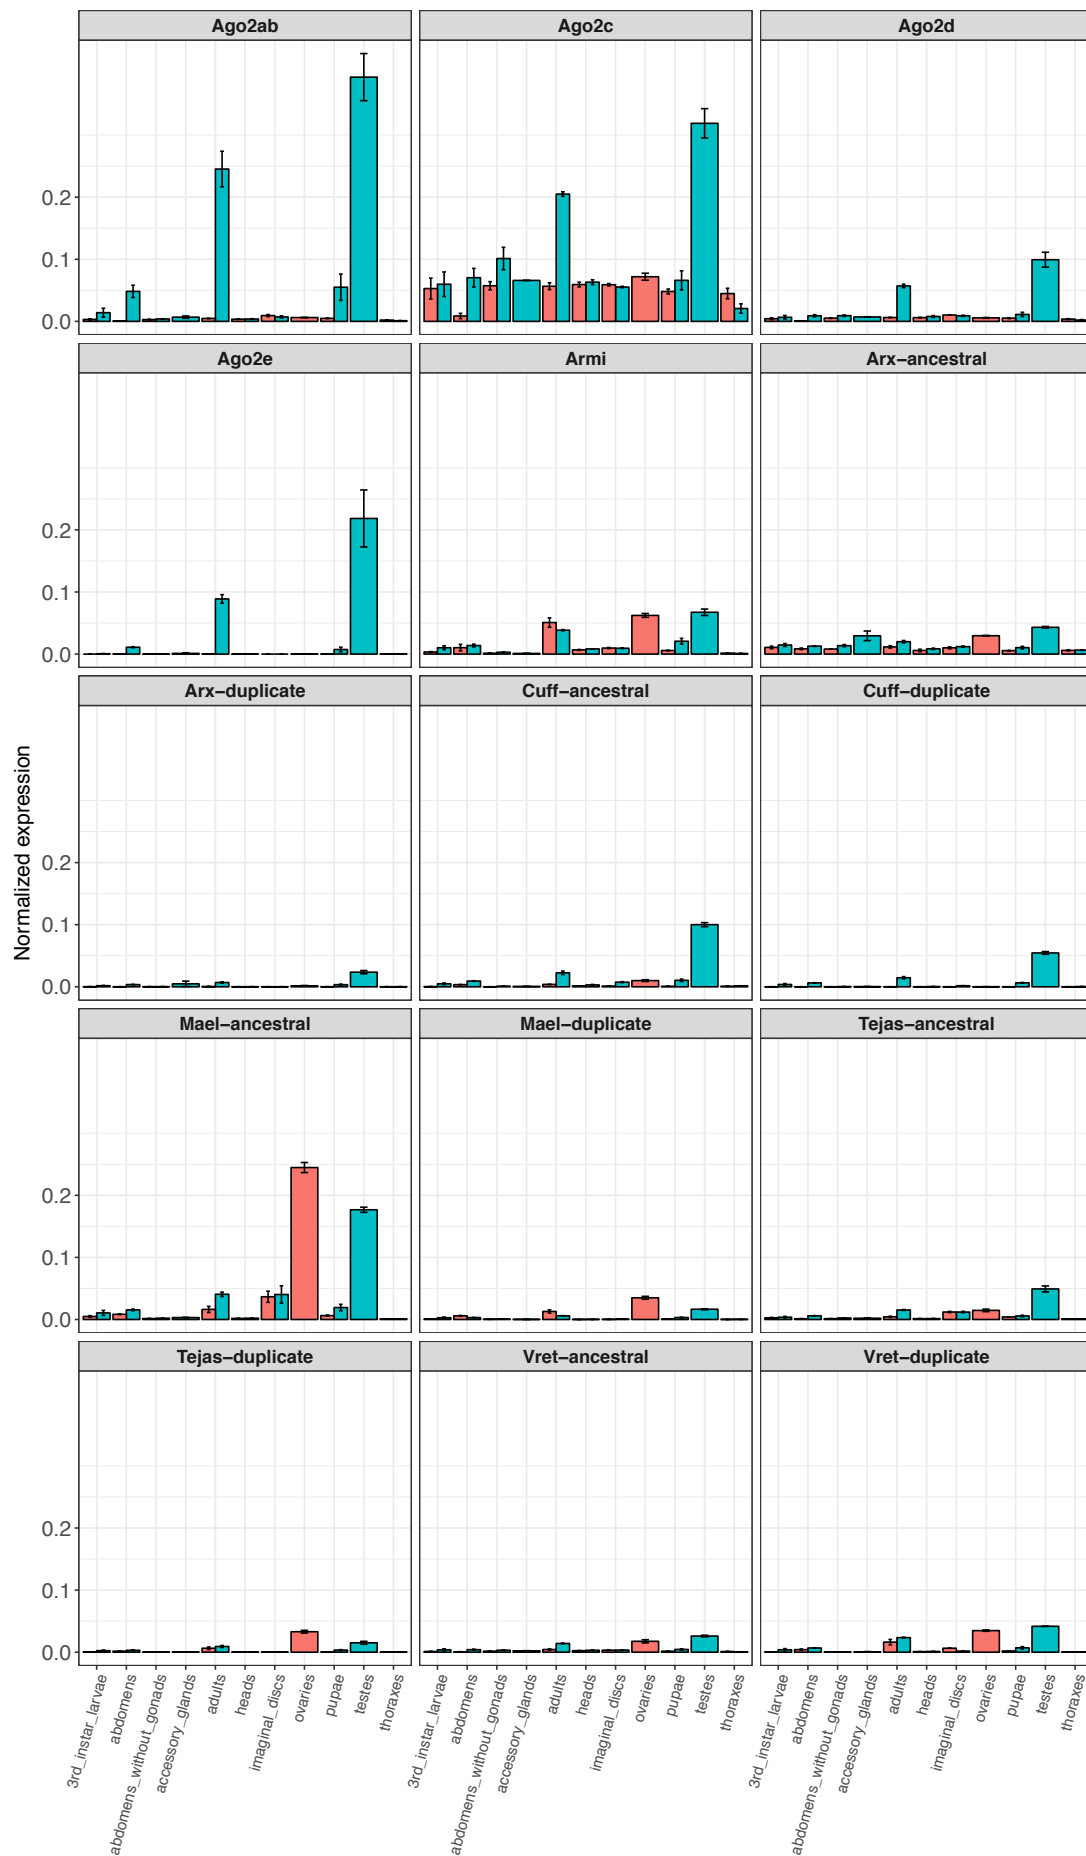

*D. obscura*

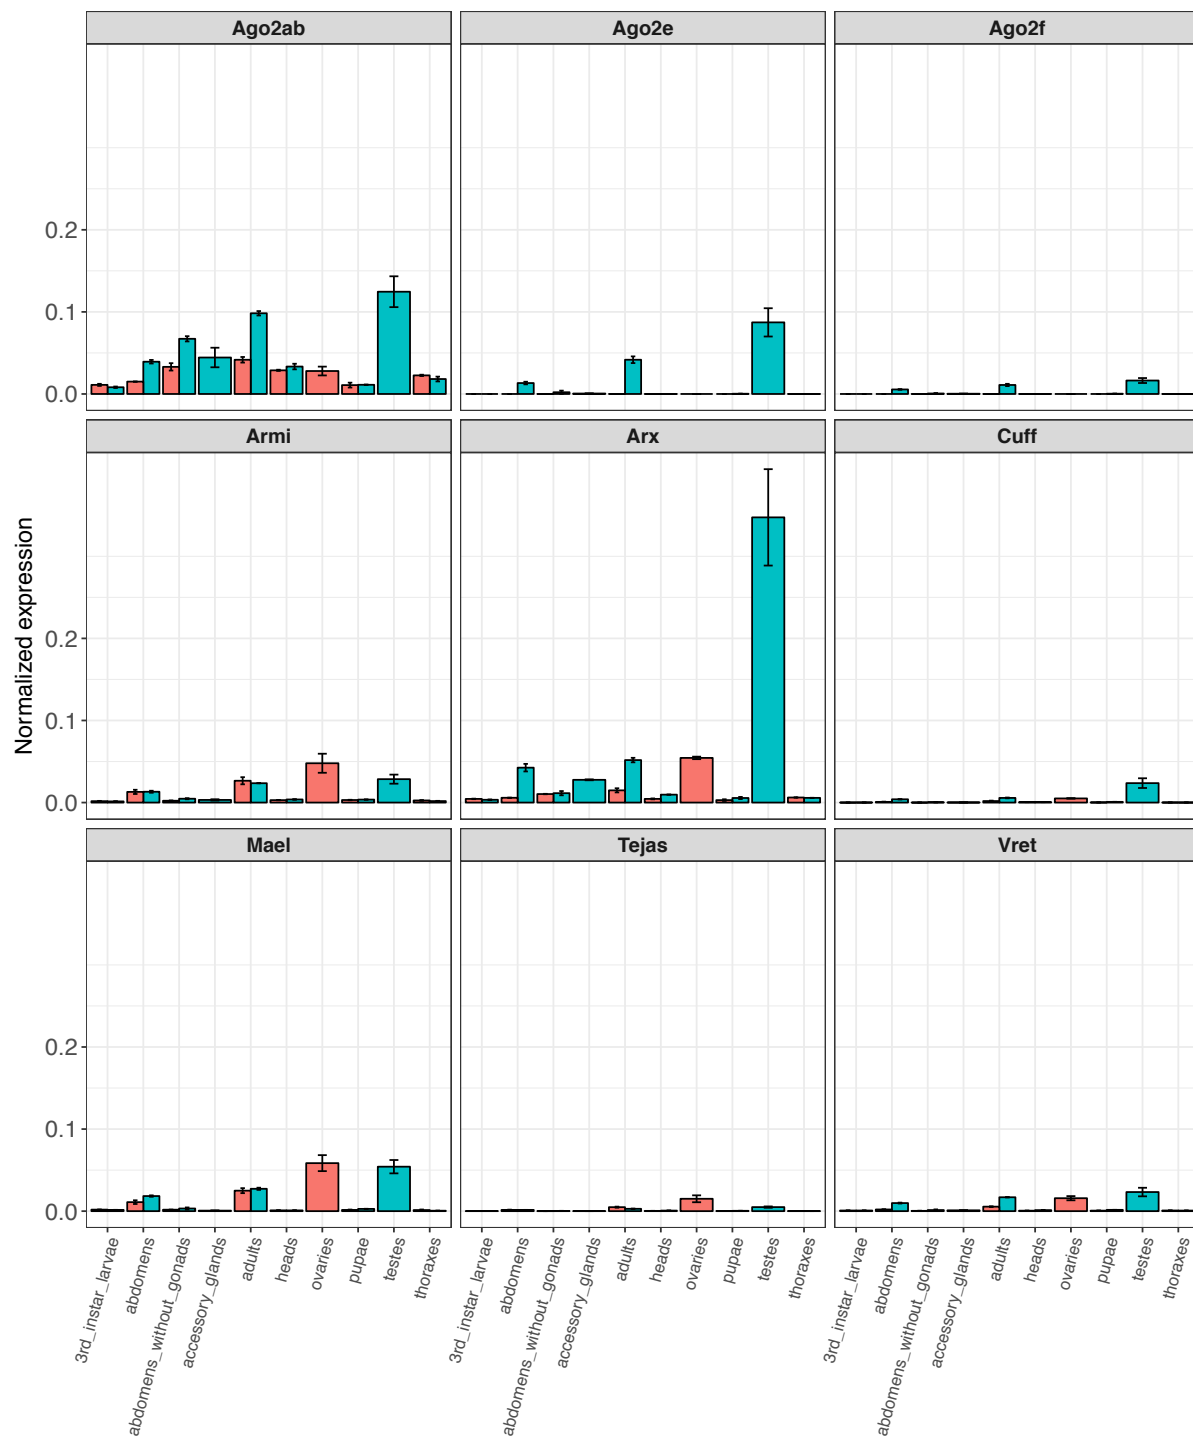

### Additional file 3 Table S2

File format: xlsx

Title: **MK test of duplicated RNAi genes in *D. pseudoobscura*-*D. miranda***

Description: Ds is synonymous divergence, Dn is non-synonomous divergence, Pn is the non-synonomous polymorphisms, Ps is the synonymous polymorphisms,  $\alpha$  represents proportion of substitutions that are adaptive, a is the absolute number of adaptive substitution. Ln is the number of non-synonomous sites, Ls is the number of synonymous sites. Ka is the number of non-synonomous mutations per non-synonomous sites and Ks the number of synonymous mutations per synonymous sites from single randomly chosen strain for each species (Li, 1993 [85] calculated using R package seqinr). Parameter  $\omega_a$  is identical to Ka/Ks ratio except that the numerator only takes adaptive divergence ( $\alpha * Dn$ )/Ln)/(Ds/Ls).

| Gene                   | Ds | Dn | Ps | Pn | alpha( $\alpha$ ) | Fisher p-value | A  | Ln      | Ls     | Ka     | Ks     | Ka/Ks        | $\omega_a$   |
|------------------------|----|----|----|----|-------------------|----------------|----|---------|--------|--------|--------|--------------|--------------|
| Armi                   | 34 | 72 | 22 | 30 | 0.356             | 0.220          | 26 | 2639.83 | 810.17 | 0.0380 | 0.0538 | 0.707        | 0.252        |
| <b>Arx-ancestral</b>   | 2  | 9  | 7  | 4  | <b>0.905</b>      | <b>0.017</b>   | 8  | 383.67  | 102.33 | 0.0246 | 0.0232 | <b>1.059</b> | <b>0.958</b> |
| Arx-duplicate          | 3  | 5  | 10 | 10 | 0.400             | 0.680          | 2  | 386.67  | 105.33 | 0.0204 | 0.0400 | 0.509        | 0.204        |
| <b>Cuff-ancestral</b>  | 5  | 29 | 10 | 10 | <b>0.828</b>      | <b>0.010</b>   | 24 | 863.67  | 255.33 | 0.0352 | 0.0275 | <b>1.281</b> | <b>1.060</b> |
| <b>Cuff-duplicate</b>  | 6  | 39 | 14 | 17 | <b>0.813</b>      | <b>0.003</b>   | 32 | 856.83  | 250.17 | 0.0297 | 0.0417 | <b>0.714</b> | <b>0.580</b> |
| Tejas-ancestral        | 11 | 24 | 10 | 23 | -0.054            | 1.000          | 0  | 1082.17 | 312.83 | 0.0312 | 0.0293 | 1.067        | 0.000        |
| <b>Tejas-duplicate</b> | 16 | 68 | 9  | 13 | <b>0.660</b>      | <b>0.046</b>   | 45 | 1264.83 | 379.17 | 0.0222 | 0.0352 | <b>0.631</b> | <b>0.416</b> |
| Mael-ancestral         | 8  | 27 | 9  | 22 | 0.276             | 0.586          | 7  | 1001.67 | 303.33 | 0.0312 | 0.0293 | 1.067        | 0.294        |
| <b>Mael-duplicate</b>  | 4  | 28 | 11 | 13 | <b>0.831</b>      | <b>0.007</b>   | 23 | 865.67  | 247.33 | 0.0323 | 0.0162 | <b>2.000</b> | <b>1.662</b> |
| Vret-ancestral         | 17 | 34 | 37 | 70 | 0.054             | 1.000          | 2  | 1610.33 | 471.67 | 0.0211 | 0.0360 | 0.586        | 0.032        |
| <b>Vret-duplicate</b>  | 25 | 65 | 23 | 26 | <b>0.565</b>      | <b>0.027</b>   | 37 | 1582.83 | 466.17 | 0.0517 | 0.0617 | <b>0.838</b> | <b>0.473</b> |
| <b>Ago2b</b>           | 41 | 52 | 3  | 12 | <b>-2.154</b>     | <b>0.097</b>   | 0  | 882.00  | 264.00 | 0.0590 | 0.1553 | <b>0.380</b> | <b>0.000</b> |
| Ago2c                  | 2  | 34 | 2  | 22 | 0.353             | 1.000          | 12 | 1571.83 | 483.17 | 0.0216 | 0.0041 | 5.226        | 1.845        |
| Ago2d                  | 27 | 44 | 5  | 16 | -0.964            | 0.300          | 0  | 1228.83 | 367.17 | 0.0358 | 0.0735 | 0.487        | 0.000        |
| <b>Ago2e</b>           | 3  | 18 | 54 | 16 | <b>0.951</b>      | <b>0.000</b>   | 17 | 1410.17 | 464.83 | 0.0128 | 0.0065 | <b>1.978</b> | <b>1.881</b> |

## Additional file 5 Figure S2

File format: pdf

Title: **The heat-map p-value of the difference between pairwise posterior distributions**

Description: Large p-value ( $>0.05$ ) indicates the overlapping distribution and the duplication time might be shared (blue box). Red boxes denote comparison with p-value  $< 0.05$  which indicate non-overlapping posterior distribution and an asynchronous duplication events. Pink colored box indicates the marginally significant ( $0.01 < p\text{-value} < 0.05$ ).

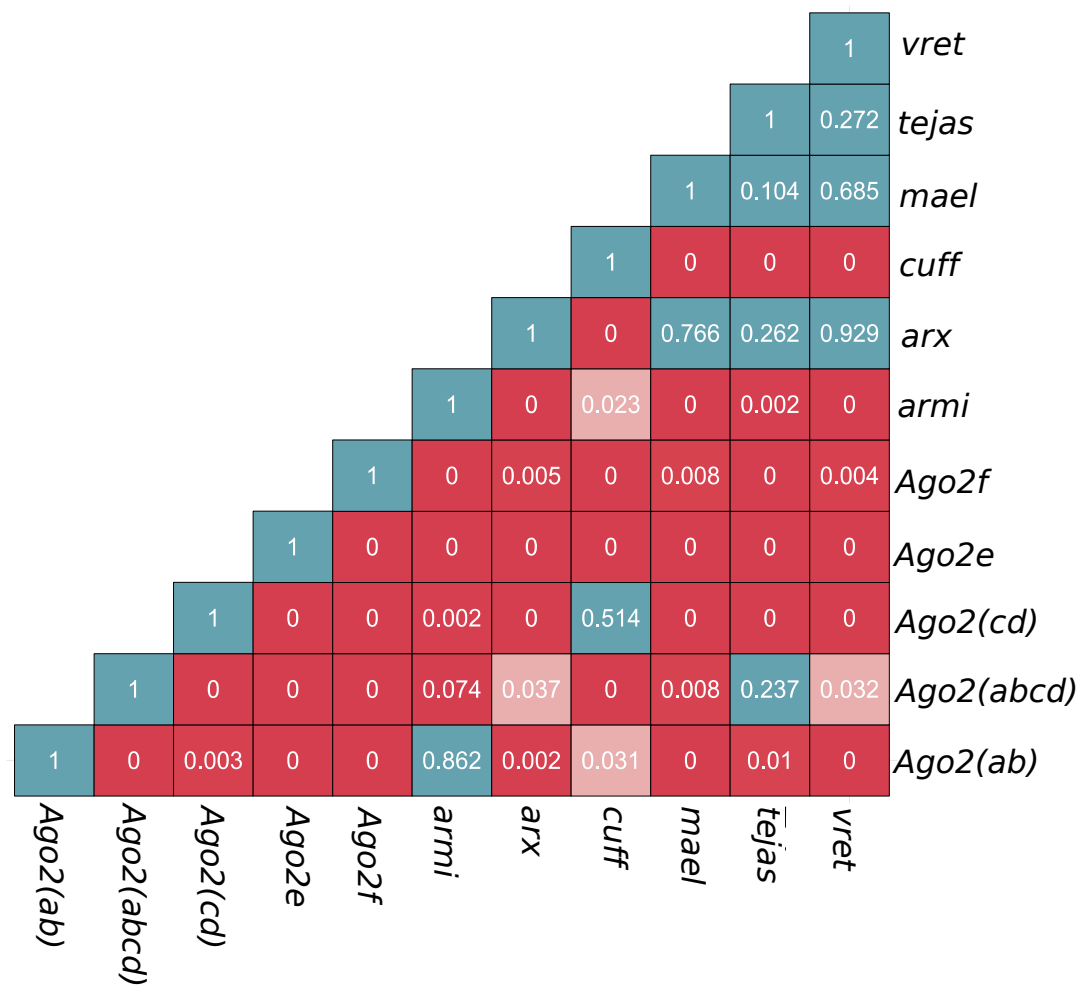

### Additional file 6 Table S3

File format: multiple-tab xlsx

Title: **Additional MK test analysis**

Description: Table the results of additional MK test analysis where minor allele frequency is removed, repetition with larger dataset and results in *D. melanogaster*

**Table 1 MK test result in *D. pseudoobscura* with MAF < 12.5% removed**

| Gene                  | Ds        | Dn        | Ps        | Pn       | $\alpha$     | Fisher p-value  |
|-----------------------|-----------|-----------|-----------|----------|--------------|-----------------|
| Armi                  | 38        | 74        | 7         | 11       | 0.193        | 0.79            |
| <b>Arx-ancestral</b>  | <b>2</b>  | <b>9</b>  | <b>3</b>  | <b>0</b> | <b>1</b>     | <b>0.0274</b>   |
| Arx-duplicate         | 3         | 5         | 1         | 1        | 0.4          | 1               |
| Cuff-ancestral        | 5         | 29        | 2         | 8        | 0.31         | 1               |
| <b>Cuff-duplicate</b> | <b>6</b>  | <b>41</b> | <b>5</b>  | <b>4</b> | <b>0.883</b> | <b>0.0099</b>   |
| Tejas-ancestral       | 11        | 24        | 5         | 11       | -0.008       | 1               |
| Tejas-duplicate       | 17        | 69        | 1         | 2        | 0.507        | 0.496           |
| Mael-ancestral        | 8         | 28        | 4         | 4        | 0.714        | 0.1846          |
| <b>Mael-duplicate</b> | <b>4</b>  | <b>31</b> | <b>2</b>  | <b>1</b> | <b>0.935</b> | <b>0.0592</b>   |
| Vret-ancestral        | 18        | 35        | 16        | 27       | 0.132        | 0.831           |
| <b>Vret-duplicate</b> | <b>25</b> | <b>68</b> | <b>8</b>  | <b>7</b> | <b>0.665</b> | <b>0.069</b>    |
| Ago2b                 | 41        | 53        | 2         | 6        | -1.321       | 0.4621          |
| Ago2c                 | 2         | 34        | 0         | 5        | 0            | 0               |
| Ago2d                 | 27        | 44        | 2         | 8        | -1.455       | 0.318           |
| <b>Ago2e</b>          | <b>4</b>  | <b>19</b> | <b>13</b> | <b>2</b> | <b>0.968</b> | <b>0.000037</b> |

**Table 2 MK test result for larger pseudoobscura dataset Fuller *et. al* [31]**

| Gene                   | Ds        | Dn        | Ps        | Pn        | NI           | $\alpha$     | Fisher p-value  |
|------------------------|-----------|-----------|-----------|-----------|--------------|--------------|-----------------|
| Armi                   | 33        | 71        | 36        | 38        | 0.491        | 0.509        | 0.02259         |
| <b>Arx-ancestral</b>   | <b>2</b>  | <b>7</b>  | <b>14</b> | <b>4</b>  | <b>0.082</b> | <b>0.918</b> | <b>0.011</b>    |
| Arx-duplicate          | 3         | 5         | 14        | 11        | 0.471        | 0.529        | 0.438           |
| <b>Cuff-ancestral</b>  | <b>4</b>  | <b>29</b> | <b>18</b> | <b>16</b> | <b>0.123</b> | <b>0.877</b> | <b>0.000569</b> |
| <b>Cuff-duplicate</b>  | <b>6</b>  | <b>39</b> | <b>15</b> | <b>18</b> | <b>0.185</b> | <b>0.815</b> | <b>0.002</b>    |
| Tejas-ancestral        | 12        | 23        | 11        | 28        | 1.328        | -0.328       | 0.62            |
| <b>Tejas-duplicate</b> | <b>14</b> | <b>67</b> | <b>16</b> | <b>23</b> | <b>0.3</b>   | <b>0.7</b>   | <b>0.0069</b>   |
| Mael-ancestral         | 8         | 27        | 7         | 22        | 0.724        | 0.276        | 0.568           |
| <b>Mael-duplicate</b>  | <b>4</b>  | <b>28</b> | <b>11</b> | <b>15</b> | <b>0.195</b> | <b>0.805</b> | <b>0.015</b>    |
| Vret-ancestral         | 17        | 33        | 44        | 85        | 0.995        | 0.005        | 1               |
| <b>Vret-duplicate</b>  | <b>25</b> | <b>65</b> | <b>25</b> | <b>27</b> | <b>0.415</b> | <b>0.585</b> | <b>0.018</b>    |

**Table 3 MK test from DGRP Freeze 1 Dataset (*D. melanogaster* - *D. simulans*)**

| Gene        | Ds        | Dn        | Ps        | Pn       | NI           | $\alpha$     | Fisher p-value |
|-------------|-----------|-----------|-----------|----------|--------------|--------------|----------------|
| <b>Arx</b>  | <b>9</b>  | <b>3</b>  | <b>3</b>  | <b>3</b> | <b>0</b>     | <b>0.333</b> | <b>0.04</b>    |
| Ago2        | 53        | 100       | 1         | 4        | 2.12         | -1.12        | 0.66           |
| Tejas       | 35        | 87        | 4         | 20       | 2.011        | -1.011       | 0.314          |
| Mael        | 22        | 36        | 4         | 5        | 0.764        | 0.236        | 0.72           |
| <b>Armi</b> | <b>54</b> | <b>64</b> | <b>17</b> | <b>6</b> | <b>0.298</b> | <b>0.702</b> | <b>0.02</b>    |
| Vret        | 45        | 30        | 13        | 17       | 1.962        | -0.962       | 0.134          |
| Cuff        | 33        | 62        | 5         | 5        | 0.532        | 0.468        | 0.49           |
