# Widespread gene duplication and adaptive evolution in the RNA interference pathways of the *Drosophila obscura* group

Danang Crysnanto<sup>1,3\*</sup>

Darren J. Obbard<sup>1,2</sup>

## Affiliation

1. Institute of Evolutionary Biology, University of Edinburgh, Charlotte Auerbach Road, Edinburgh, United Kingdom
2. Centre for Infection, Evolution and Immunity, University of Edinburgh, Edinburgh, United Kingdom
3. Present address: Animal Genomics, ETH Zurich, Zurich, Switzerland

## Email

DC: [danang.crysnanto@usys.ethz.ch](mailto:danang.crysnanto@usys.ethz.ch)

DJO: [darren.obbard@ed.ac.uk](mailto:darren.obbard@ed.ac.uk)

\*Author for correspondence

## ABSTRACT

**Background:** RNA interference (RNAi) related pathways provide defense against viruses and transposable elements, and have been implicated in the suppression of meiotic drive elements. Genes in these pathways often exhibit high levels of adaptive substitution, and over longer timescales show frequent gene duplication and loss—most likely as a consequence of their role in mediating conflict with these parasites. This is particularly striking for *Argonaute 2* (*Ago2*), which is ancestrally the key effector of antiviral RNAi in insects, but has repeatedly formed new testis-specific duplicates in the recent history of the *Drosophila obscura* group.

**Results:** Here we take advantage of publicly available genomic and transcriptomic data to identify six further RNAi-pathway genes that have duplicated in this clade of *Drosophila*, and examine their evolutionary history. As seen for *Ago2*, we observe high levels of adaptive amino-acid substitution and changes in sex-biased expression in many of the paralogs. However, our phylogenetic analysis suggests that co-duplications of the RNAi machinery were not synchronous, and our expression analysis fails to identify consistent male-specific expression.

**Conclusions:** These results confirm that RNAi genes, including genes of the antiviral and piRNA pathways, undergo frequent independent duplications and that their history has been particularly labile within the *Drosophila obscura* group. However, they also suggest that the selective pressures driving these changes have not been consistent, implying that more than one selective agent may be responsible.

**Keywords:** gene duplication, RNAi, RNA interference, adaptive evolution, neofunctionalization

## Introduction

Gene duplication is an important process in molecular evolution, providing raw genetic material for evolutionary innovation. The subsequent evolutionary dynamics following gene duplication are often described in terms of two alternative models, 'neofunctionalization' and 'sub-functionalization' [1]. Under neofunctionalization, the functional redundancy following duplication provides relaxed selective constraint, and allows new mutations to accumulate through genetic drift. Most such mutations will reduce the functionality of the gene (resulting in pseudogenization), but some paralogs can be selected for novel or derived functions. Under sub-functionalization, the duplicates independently accumulate mutations that allow them to specialise in a subset of ancestral functions of a pleiotropic gene. Neo-functionalization leads to asymmetrical evolutionary rates among paralogs (with faster evolution in paralogs that gain derived function), whereas equal rates are expected for the latter [2]. It has been suggested that both processes have played an important role in the rapid evolution of RNA interference-related pathways, including the long- and short-term evolutionary history of the Argonautes, the effectors of RNAi [3–5].

The RNAi-related pathways comprise a range of small-RNA mechanisms best known for their roles in mediating the control of gene expression, antiviral responses, and defence against mobile genetic elements (respectively: the miRNA pathway; Dicer-1 and Argonaute-1 in insects [6]; the siRNA pathway; Dcr-2 and Argonaute 2 in insects [7]; and the piRNA pathway; piwi-family Argonaute AGO3 and Piwi/Aub in insects [8, 9]). In addition, RNAi-related pathways have been implicated in a variety of biological processes, such as the control of dosage compensation [10–12] and the suppression of genetic drive [13–18], among others. Several genes involved in the defensive piRNA

and siRNA pathways, but not the miRNA pathway, display elevated rates of adaptive protein evolution. This is best studied in *Drosophila* [19–21], but is also detectable in other insects [22]. It has been hypothesised that this is a consequence of parasite-mediated ‘arms-race’ coevolution [20, 23], either through conflict with parasite-encoded immune suppressors—as widely seen in RNA viruses [24]— or in the case of the piRNA pathway, through selection for ‘re-tuning’ suppression mechanisms [25].

Adaptive evolution of RNAi pathways is also partly reflected in the gain, loss, and functional divergence of Argonaute-family duplications [26]. For example, within the Drosophilidae—an important model for RNAi-related pathways of animals—Piwi has been duplicated in the lineages leading to *Phortica variegata* and *Scaptodrosophila deflexa* [3], and Ago2 has been duplicated in those leading to *S. deflexa*, *D. willistoni*, *D. melanogaster* (where only one paralog remains – the canonical Ago2) and *D. pseudoobscura* [4]. This is particularly striking in the *Drosophila obscura* species group, which has experienced at least 6 independent duplications of Ago2 over the last 20 million years, with all but one of the resulting duplicates becoming testis-specific, and most displaying evidence of recent and/or ongoing positive selection [4].

Very recently it has been noted that several accessory components of the siRNA and piRNA pathways have also been duplicated in *D. pseudoobscura*, including *armitage*, *asterix*, *cutoff*, *maelstrom*, *tejas* and *vreteno* [22]. In *D. melanogaster*, these proteins are engaged in a number of roles in the piRNA pathway (**Table 1**). Here we use publicly available data to reconfirm the history and expression of Ago2 in the *obscura* group, and to test whether duplications in the other genes also show male-specific expression, whether they are contemporaneous with those of Ago2, and whether they too show strong signatures of adaptive protein evolution. We find no clear pattern of these duplications being coincident with Ago2 duplications, but both

*asterix* and *cutoff* duplications display increased sexual dimorphism relative to their ancestral copies, through decreased female expression. In addition, several of the gene duplicates show evidence of adaptive protein evolution in *D. pseudoobscura*, including both copies of *cutoff*, the ancestral copy of *asterix*, and the new duplicates of *tejas*, *maelstrom* and *vreteno*.

## RESULTS

### Obscura group *Argonaute 2* are duplicated and show male-biased expression

The *Drosophila obscura* group has experienced multiple duplications of *Ago2* and it has previously been shown that these are associated with positive selection and testis-specific expression [4]. Here we reanalyzed the expression patterns and evolutionary history of these genes using publicly available RNAseq and genomic data, additionally including newly available genomic sequences from *D. algonquin*, *D. athabasca*, *D. bifasciata* and *D. miranda*. In contrast to the previous qPCR analysis that failed to identify strong expression of the ancestral copy in *D. pseudoobscura* (*Ago2d* [4]), we found that all the *Ago2* homologs in *D. pseudoobscura* were detectable at a high level in RNAseq data, and that that all show significant male-bias (**Figure 1**). The *Ago2d* expression detected here is unlikely to be an artefact of cross-mapping between paralogs as we observed the reads that mapped uniquely across the gene. The male bias was largest for *Ago2e*, where expression in males is approximately 1000-fold higher than females (pMCMC<0.001; **Figure 1**), and smallest in *Ago2c* and the ancestral copy *Ago2d*, consistent with the ca. two-fold enrichment of the single copy of *Ago2* in male *D. melanogaster*. We also confirmed that *D. miranda*, a close relative of *D. pseudoobscura* that has not previously been analyzed, displayed a qualitatively similar pattern among those paralogs represented (**Figure 1**). In *D. obscura* and we

found the ancestral copy (*Ago2a*) again showed slightly, but marginally significantly, higher expression in males ( $pMCMC=-0.014$ ), but that other *Ago2* proteins showed a strong male biased expression, with the largest effect for *Ago2f*, where male expression was 2000-fold higher (**Figure 1**;  $pMCMC<0.001$ ).

# **Six piRNA pathway genes are duplicated, and *asterix* and *cutoff* duplicates show increased male-bias in their expression**

Palmer *et al.* [22] recently identified six accessory piRNA pathway genes that have also experienced duplication in the obscura group (**Additional file 1 Table S1**). We could locate the duplicates for all genes in *D. pseudoobscura*, except for *armitage* where we instead identified a duplicate in the affinis subgroup but not in the obscura or subobscura subgroups. Where new chromosomal locations could be determined by synteny in *D. pseudoobscura*, we found that *cutoff*, *maelstrom* and *vreteno* were duplicated from an autosome to the X chromosome, *asterix* duplicated from the X chromosome to an autosome, and *tejas* duplicated between autosomal locations. Two duplicates (*asterix* and *tejas*) lack introns, suggesting they are retro-transcribed copies created through an mRNA intermediate.

Using public RNAseq data from *D. pseudoobscura*, *D. miranda*, and *D. obscura*, we found that all of the gene duplicates were expressed (**Figure 2**). *Armitage*, which was not duplicated within the newly examined lineages for which RNAseq data were available, did not show strong sex-biased expression. Similarly, *tejas*, *maelstrom*, and *vreteno* were not strongly differentially expressed between the sexes, and nor were their duplicates in *D. pseudoobscura* and *D. miranda*. In contrast, both *asterix* and *cutoff* duplicates displayed substantially reduced expression in females and slightly increased expression in males (**Figure 2**). For example, as previously reported from

qPCR analysis [27] the paralog of *asterix* in *D. pseudoobscura* displays ca. 1000-fold higher expression in males than females. In both *D. pseudoobscura* and *D. miranda*, those genes with overall strongly increased male-biased expression (*Argonaute 2*, *asterix*, *cutoff*, and their paralogs) had the highest expression in testis, and had reduced their expression in ovaries (**Additional file 2 Figure S1**).

## **Adaptive amino-acid substitutions are generally more common in the duplicates**

Using population genetic data from *D. pseudoobscura*, and *D. miranda* as an outgroup, we used the McDonald-Kreitman framework and a maximum-likelihood extension to estimate the rate of adaptive substitution in protein sequences, and to test whether this was different between the ancestral and duplicated copies [28, 29]. Treating genes individually, we found evidence for positive selection acting on at least one paralog for each of the genes except *asterix* and *Ago2c* ( $p < 0.05$ ; **Additional file 3 Table S2**). Among the ancestral copies, only *cutoff* displayed evidence of positive selection. We then tested whether the paralogs generally showed a different pattern of selection to the ancestral copies by dividing the genes into two classes (6 ancestral copies and 8 paralogs) and comparing the likelihood of models that allowed the classes to differ in the adaptive rate  $\alpha$  (**Table 2**) [29]. The best supported model allowed  $\alpha$  to differ between ancestral and duplicate copies (Akaike weight: 0.81), and the second best supported model was that in which  $\alpha=0$  for the ancestral copies (Akaike weight: 0.19), providing overall evidence that the paralogs have experienced more adaptive protein evolution. In the best-supported model, the  $\alpha$  was estimated to be 0.68 for the duplicate group, which more than three times larger than the ancestral group (0.20). In case segregating weakly-deleterious variants had led to a downward bias in estimates of  $\alpha$ , we repeated this analysis excluding all alleles with a minor allele

frequency <0.125 [30], although this reduced power to the extent that few genes remained individually significant (**Additional file 6 Table S3**). We also repeated the analysis with a larger dataset PRJNA326536 [31] (**Additional file 6 Table S3**), and obtained qualitatively similar results ( $R^2=0.946$  for  $\alpha$  estimate between the analyses; the second dataset, while larger, is less suitable for analysis as only the third chromosome is a direct sample from a wild population).

## Gene duplications were unlikely to be contemporaneous

Given the multiple duplications of *Ago2* and the piRNA pathway components in the obscura group, we hypothesized that some duplications may have occurred near-simultaneously, duplicating whole components of a pathway together. We therefore used relaxed-clock phylogenetic methods to estimate the relative timings of each duplication. In agreement with the previous analysis of *Ago2* [4], we found that the duplications giving rise to *Ago2e* and *Ago2f* predated the split between the obscura and pseudoobscura subgroups, with a subsequent loss of *Ago2f* from the pseudoobscura subgroup (**Figure 3**). In contrast, we found that duplications in five of the other six genes unambiguously occurred after the obscura/pseudoobscura split, with the timing of duplication in *maelstrom* being uncertain. Briefly, *armitage* displayed a single duplication shared by members of the affinis subgroup, *asterix* and *tejas* a single duplication each in the lineage leading to *D. pseudoobscura* (which were subsequently lost in the affinis subgroup), *cutoff* a single duplication recently in the pseudoobscura subgroup, and *vreteno* a single duplication at the base of the obscura group (**Figure 4**). For *maelstrom*, the maximum clade credibility tree suggests duplication occurred very slightly prior to this split, followed by subsequent loss of one paralog the obscura subgroup (**Figure 4**). However, this was poorly supported, and similar pattern to the others genes may be more parsimonious. We used the posterior



distributions of split times, relative to the divergence time of the *obscura* and *pseudoobscura* subgroups, to infer whether or not duplications occurred at approximately the same time (**Figure 5**). Although the small amount of information available from single genes made relative timings highly uncertain, it is clear that few of the *Ago2* duplications could have been concurrent with the piRNA-pathway duplications (**Additional file 5 Figure S2**). However, the recent and rapid duplications within the piRNA could have been concurrent, with *vreteno*, *tejas*, *maelstrom* and *asterix* not differing significantly, all having duplicated very close to the split between *D. obscura* and *D. pseudoobscura* (posterior overlap >0.1 in each case; **Additional file 5 Figure S2**).

## DISCUSSION

Although four of the six piRNA pathway duplicates did not display altered tissue specificity compared to the ancestral copy, *asterix* and *cutoff* both became significantly more male biased, as did each of the *Ago2* duplicates [4]; **Figure 1, Figure 2**). In each case, this was due to higher (or exclusive) expression in the testis. The duplicated genes also showed higher rates of adaptive amino acid substitution, together and individually, whereas only two (*asterix* and *armitage*) displayed evidence of positive selection when single-copy in *D. melanogaster* (**Additional file 6 Table S3**).

This new tissue specificity and the rapid evolution of duplicated copies broadly suggest that gene duplication in these pathways may be associated with functional diversification through neofunctionalization, for example by testis-specific selective pressure. Three main selective pressures seem likely candidates to have driven this. First, given the role of *Ago2* in antiviral defense in *Drosophila* [7], and the role of the piRNA pathway in antiviral defense in mosquitoes [32], it is possible that these

duplications have specialized to a virus that is active in the male germline, such as *D. obscura* and *D. affinis* Sigmaviruses [33]. Second, given the role of all of these genes in the suppression of transposable elements (TEs), their evolution may have been shaped by the invasion of TEs that are more active in testis, as seen for Penelope [34] and copia [35]. Such a ‘duplication arms-race’ in response to TE invasion is thought to occur in mammals, where repeated duplications of KRAB-ZNF family are selected following the invasion of novel TEs, and subsequently provide defence [36, 37]. Alternatively, duplicates may quantitatively enhance the pre-existing response to TEs, as suggested for another rapidly-evolving piRNA-pathway component, Rhino [38].

The third, and arguably most compelling hypothesis, is that selection is mediated by conflict with meiotic drive elements, such as sex ratio distorting X-chromosomes [39, 40]. Most directly, meiotic drive elements are common in *Drosophila*, and RNAi-related pathways have been widely implicated in their action and suppression [15, 16, 18]. In addition, sex-chromosome drive is widespread in the *Drosophila obscura* group. X chromosome drive was first described in *D. obscura*, and has also been reported in *pseudoobscura*, *persimilis*, *affinis*, *azteca*, *subobscura* and *athabasca* [39] and is mediated through a testis-specific function (Y-bearing sperm have reduced function). Finally, a testis-specific class of hairpin (endo) siRNAs is required for male fertility in *D. melanogaster* [41], testes-restricted clustered miRNAs show rapid evolutionary turnover and are represented in large numbers in *D. pseudoobscura* [42], and suppression of sex-specific duplicates of S-Lap1 via a small-RNA mechanism has very recently been implicated in the meiotic drive mechanism of *D. pseudoobscura* [17]. In this context, it is also interesting to note that Ago2 is involved in directing heterochromatin formation in *Drosophila* dosage compensation [10–12], and that in *D.*

*melanogaster* the sex-ratio distorting *Spiroplasma* achieves male-killing through the disruption of dosage compensation, although this acts at the embryonic stage [43]. Nevertheless, in the absence of mechanistic studies, this remains highly speculative. Testis is generally more permissive to gene expression and testis-specific expression may be a transient state (i.e. the “Out of Testis Hypothesis” [44]). In addition, the application of MK-like analyses to paralogs is inherently flawed [1], as the MK framework implicitly assumes that the selective regime has been consistent across all (group and outgroup) sequences analyzed. If gene duplicates experience an early but transient period of relaxed constraint, a high proportion of the amino-acid fixations may have occurred as a result of genetic drift that is no longer detectable from current patterns of polymorphism.

## Methods

### Sequence collation and paralog identification

The full-length sequences for 7 RNA interference genes; *armitage* (*armi*), *asterix* (*arx*), *cutoff* (*cuff*), *tejas* (*tej*), *vreteno* (*vret*), *maelstrom* (*mael*), and *Argonaute 2* (*Ago2*) from 12 obscure group species were identified using tBLASTn (BLAST+ 2.6.0) [45] with a local BLAST database (see below for the details of the construction of local genomic database). Known gene sequences from *D. pseudoobscura* and *D. melanogaster* were used as a query with a stringent e-value threshold (1e-40). Genes were inferred to have been duplicated when BLAST indicated that there were multiple full-length hits located in different genomic regions. The sequences were manually inspected, introns removed and the coding frame identified using Bioedit v 7.2 [46]. Genes in *D. pseudoobscura* were classified as ancestral or duplicate copies based on the syntenic

orthology with *D. melanogaster* using Flybase Genome Browser [47]. High quality genomes are not available for other members of the *obscura* groups, and in those cases ancestral/derived status was assigned based on homology with *D. pseudoobscura*. To provide a comprehensive overview of the evolution of the RNAi paralogs, we included 24 *Drosophila* species outside of *obscura* group with assembled genomes already available in public databases. The Flybase and NCBI tblastn online portal were used to identify the target genes with queries from *D. melanogaster* or closely related species.

Five *obscura* group species had assembled genomes at the time of this study: *D. pseudoobscura* (assembly Dpse\_3.0 [48]), *D. miranda* (assembly DroMir\_2.2 [49] [50]), *D. persimilis* (assembly dper\_caf1 [51]), *D. affinis* (*Drosophila affinis* Genome Release 1.0 [52]) and *D. lowei* (*Drosophila lowei* Genome Release 1.0 [52, 53]) and in these cases the genome was directly used for local BLAST database. For four species (*D. obscura*, *D. subobscura*, *D. subsilvestris*, *D. tristis*) we used de novo assembled transcriptomes based on paired RNA-seq reads data from wild-collected males [54] (Accession: PRJNA312496). Assembly was performed using Trinity [55] with ‘--trimmomatic’ and otherwise default parameters, and the assembled transcriptome was searched locally using BLAST. For three other species: *D. athabasca*, *D. Algonquin* [56] (Accession: PRJNA274695) and *D. bifasciata* (Accession: PRJDB4817), only unassembled genomic reads were available. For these species we applied a targeted assembly approach as follows: (i) reads that had local similarity with all known duplicated RNAi proteins were identified using Diamond [57] with relaxed e-value of 1; (ii) hits from Diamond were then retained and used for assembly using Spades v3.10.1 [58]; and (iii) scaffolds produced by Spades were then used as references in local BLAST database.

## Phylogenetic analysis and the relative timing of duplications

Bayesian relaxed clock trees were used to infer the evolutionary relationship among paralogs. First, the sequences were aligned as translated nucleotide in Clustal W [59] with default parameters. Regions with ambiguous alignment were identified and removed manually by eye. A total of 7 gene trees were then inferred using Beast v1.7.0 [60]. Inference used a relaxed clock model with an uncorrelated lognormal distribution among branches, and an HKY substitution model with empirical base frequencies and rate variation among sites was modelled as a gamma distribution with four categories. The site model allowed for third codon position to have different substitution model from the other positions.

The trees were scaled by setting the time to most recent common ancestor of the *D. obscura* group to have lognormal distribution with a data-scale mean of 1, and a very small standard deviation of 0.01. This had the advantage of scaling all duplications to the same relative timescale, while allowing different genes and different paralogs to vary in their rate. To record the posterior ages of duplication, we specified the ancestral and duplicated genes as a distinct taxon set. The Monte Carlo Markov Chain analysis was run for at least 100 million states and posterior sample was recorded every 10000 states. Log files were then inspected in Tracer v1.6 [61] for parameter stationarity, and adequate sampling as indicated by an effective sample size over 200. Finally, 25% of initial trees were discarded as burn-in, and maximum clade credibility trees were summarized using Tree Annotator. Parameter MCMC files were processed using a custom R script [62] to infer the posterior distribution the age of duplication for each gene and to quantify the degree overlapping between these age distributions.

## Differential expression analysis of the duplicated RNAi genes

For this analysis, we used obscura group transcriptome datasets available in EBI ENA (European Nucleotide Archive, <http://www.ebi.ac.uk/ena>) and DDBJ (DNA DataBank of Japan, <http://www.ddbj.nig.ac.jp/>) that included the sex and tissue annotation. The datasets comprised 163, 42 and 34 RNA-seqs datasets of *D. pseudoobscura*, *D. miranda* and *D. obscura* respectively; Bioproject: DRA004463, PRJEB1227 [63], PRJNA226598, PRJNA219224 [64], PRJNA326536 [31], PRJNA74723, PRJNA321079, PRJNA291085 [65], PRJNA268967 [66]. Since our main interest was the comparison expression between sex, but not its absolute expression value, we performed a simple read-counting analysis. In outline, each RNA-seq dataset was mapped to the full-length CDS using Bowtie2 v2.3.2 [67] with mode ‘--very sensitive’ and otherwise default parameters. The reads mapped to reference were counted using combination of SAMtools view flag -F 4 and SAMtools idxstats v1.4 [68]. The count data were then normalized by gene length and read depth, where it was then scaled relative to the expression of RpL32. To determine the statistical significance of difference gene expression, generalised linear mixed models were fitted using R package MCMCglmm [69] with sex as fixed effect and tissue as a random effect, and log-transformed normalised expression as the response variable. The natural logarithm transformation ( $\log_e$ ) was used to reduce the skewness of the distributions. To allow for zero value for non-expressed genes, the genes with read count 0 was replaced with 1.

$$Y \sim \mu + \text{sex} + \text{tissue (random)} + \varepsilon$$

Where Y is  $\log_e$  transformed normalized expression data (response variable),  $\mu$  is mean of  $\log_e$  transformed expression and  $\varepsilon$  is residual error. The random effects

(tissue) and the residual were assumed to be distributed multivariate normal with mean 0 and uncorrelated covariance matrix  $MVN(0, I\sigma^2)$ . Sex was modelled as a factor with 2 variables (male-female) and tissue contained 13 variables of different tissue.

## Population Genetic Analysis of the RNAi Duplicated Genes

We used the McDonald-Kreitman test [28] to compare the rate of adaptive evolution between ancestral and duplicate genes using polymorphism data from publicly-available sequencing datasets: Pseudobase (12 strains of *pseudoobscura*, Accession list: SRP007802 [53]) and 12 strains *D. miranda* (Bioproject: PRJNA277849 [70]).

Genomic reads for each strain were mapped to the genomic reference using Bowtie2 with ‘--very-sensitive’ mode and otherwise default parameters and reads mapped to the genes of interest were extracted using SAMtools view (flag -F 4). Duplicate reads were marked using MarkDuplicates (Picard Tools [71]). To reduce the excessive variants surrounding indel, we then applied GATK IndelRealigner [71], which discards the original mapping and performs local-realignment around indel. The output was then sorted and indexed and the BAM file was used for ‘mpileup’ variant calling (SAMtools v1.4 [72]). The output VCF files were then filtered to only include SNP (GATK SelectVariants [71]), and variants that were covered by less than five reads were masked with ‘N’ (undetermined bases, --snpmask GATK v3.5 [71]). The variant files were then converted to FASTA format using GATK FastaAlternateReferenceMaker, which replaced genomic reference with variants defined in VCF files [73] and output the heterozygous calls with IUPAC ambiguous code. Finally, FastPHASE [74] was used to generate pseudo-haplotypes, although haplotype information was not utilized by the analysis.

MK tests were performed for each gene on *D. pseudoobscura*-*D. miranda*. DNAsp v5.0 [75] was used to estimate the statistics for the MK test and Fisher's exact test was used to calculate the statistical significance for single-gene analyses. Genes were then grouped into ancestral and duplicate genes, and a cross-gene analysis was performed using a maximum likelihood extension of the MK test [29]. Five different models were fitted that differed in the constraint of  $\alpha$  (proportion of non-synonymous substitutions estimated to be adaptive), and the relative support between models was compared using Akaike Weights.

## List of Abbreviations

**Ago2**: Agronaute 2 **armi**: armitage **arx**: asterix **BAM**: Binary Alignment Map **BLAST**: Basic Alignment Search Tool **cuff**: cutoff **GATK**: Genome Analysis Toolkit **HKY**: Hasegawa, Kishino and Yano model **mael**: maelstrom **MCMC**: Monte Carlo Markov Chain **MK**: McDonald-Kreitman test **RNAi**: RNA interference **SNP**: Single Nucleotide Polymorphism **TE**: Transposable Elements **tej**: tejás **VCF**: Variant Call Format **vret**: vreteno

## Declarations

### Ethics approval and consent to participate

Not applicable

### Consent to publication

Not applicable

### Availability of data and material

Fasta alignment (both for phylogenetic and MK analysis) and raw expression data are available via Figshare (DOI: 10.6084/m9.figshare.7145720).



## Competing interests

The authors declare that they have no competing interests.

## Funding

DC was financially supported by a Master's Training Scholarship from the Indonesian Endowment Fund for Education (LPDP) and the University of Edinburgh School of Biological Science Bursary for MSc in Quantitative Genetics and Genome Analysis.

## Authors' contributions

DJO and DC conceived the study and designed the analysis, DC analyzed the data and wrote the first draft of the manuscript. Both authors read and approved the final manuscript.

## Acknowledgements

We thank Billy Palmer for initial discussion on the variant calling, and Billy Palmer and Samuel Lewis for comments on an earlier version of this manuscript. We thank the many people who made their published data publicly available, and Shu Kondo for permission to use unpublished data from *D. bifasciata*.

## References

1. Hahn MW. Distinguishing Among Evolutionary Models for the Maintenance of Gene Duplicates. *J Hered.* 2009;100:605–17. doi:10.1093/jhered/esp047.
2. Innan H, Kondrashov F. The evolution of gene duplications: classifying and distinguishing between models. *Nat Rev Genet.* 2010;11:97–108. doi:10.1038/nrg2689.
3. Lewis SH, Salmela H, Obbard DJ. Duplication and diversification of dipteran argonaute genes, and the evolutionary divergence of Piwi and Aubergine. *Genome Biol Evol.* 2016;8:507–18.
4. Lewis SH, Webster CL, Salmela H, Obbard DJ. Repeated duplication of Argonaute2 is associated with strong selection and testis specialization in *Drosophila*. *Genetics.* 2016;204:757–69.
5. Singh RK, Gase K, Baldwin IT, Pandey SP. Molecular evolution and diversification of the Argonaute family of proteins in plants. *BMC Plant Biol.* 2015;15:23. doi:10.1186/s12870-014-0364-6.
6. Vidigal JA, Ventura A. The biological functions of miRNAs: lessons from in vivo studies. *Trends Cell Biol.* 2015;25:137–47. doi:10.1016/j.tcb.2014.11.004.
7. Bronkhorst AW, van Rij RP. The long and short of antiviral defense: small RNA-based immunity in insects. *Curr Opin Virol.* 2014;7:19–28. doi:10.1016/J.COVIRO.2014.03.010.
8. Czech B, Hannon GJ. One Loop to Rule Them All: The Ping-Pong Cycle and piRNA-Guided Silencing. *Trends Biochem Sci.* 2016;41:324–37. doi:10.1016/j.tibs.2015.12.008.
9. Lewis SH, Quarles KA, Yang Y, Tanguy M, Frézal L, Smith SA, et al. Pan-arthropod analysis reveals somatic piRNAs as an ancestral defence against transposable elements. *Nat Ecol Evol.* 2018;2:174–81. doi:10.1038/s41559-017-0403-4.
10. Menon DU, Meller VH. A role for siRNA in X-chromosome dosage compensation in *Drosophila melanogaster*. *Genetics.* 2012;191:1023–8. doi:10.1534/genetics.112.140236.
11. Tang W, Seth M, Tu S, Shen E-Z, Li Q, Shirayama M, et al. A Sex Chromosome piRNA Promotes Robust Dosage Compensation and Sex Determination in *C. elegans*. *Dev Cell.* 2018;44:762–770.e3. doi:10.1016/j.devcel.2018.01.025.
12. Deshpande N, Meller VH. Chromatin That Guides Dosage Compensation Is Modulated by the siRNA Pathway in *Drosophila melanogaster*. *Genetics.* 2018;209:1085–97. doi:10.1534/genetics.118.301173.
13. Tao Y, Masly JP, Araripe L, Ke Y, Hartl DL. A sex-ratio Meiotic Drive System in *Drosophila simulans*. I: An Autosomal Suppressor. *PLoS Biol.* 2007;5:e292. doi:10.1371/journal.pbio.0050292.
14. Tao Y, Araripe L, Kingan SB, Ke Y, Xiao H, Hartl DL. A sex-ratio Meiotic Drive System in *Drosophila simulans*. II: An X-linked Distorter. *PLoS Biol.* 2007;5:e293. doi:10.1371/journal.pbio.0050293.
15. Gell SL, Reenan RA. Mutations to the piRNA pathway component aubergine enhance meiotic drive of segregation distorter in *Drosophila melanogaster*. *Genetics.* 2013;193:771–84. doi:10.1534/genetics.112.147561.
16. Aravin AA, Klenov MS, Vagin V V, Bantignies F, Cavalli G, Gvozdev VA. Dissection of a natural RNA silencing process in the *Drosophila melanogaster* germ line. *Mol Cell Biol.* 2004;24:6742–50. doi:10.1128/MCB.24.15.6742-6750.2004.

17. Ellison C, Leonard C, Landeen E, Gibilisco L, Phadnis N, Bachtrog D. Rampant cryptic sex chromosome drive in *Drosophila*. doi:10.1101/324368.
18. Lin C-J, Hu F, Dubruille R, Smibert P, Loppin B, Correspondence ECL. The hpRNA/RNAi Pathway Is Essential to Resolve Intragenomic Conflict in the *Drosophila* Male Germline. 2018. doi:10.1016/j.devcel.2018.07.004.
19. Obbard DJ, Jiggins FM, Halligan DL, Little TJ. Natural selection drives extremely rapid evolution in antiviral RNAi genes. *Curr Biol*. 2006;16:580–5.
20. Obbard DJ, Gordon KHJ, Buck AH, Jiggins FM. The evolution of RNAi as a defence against viruses and transposable elements. *Philos Trans R Soc Lond B Biol Sci*. 2009;364:99–115. doi:10.1098/rstb.2008.0168.
21. Kolaczowski B, Hupalo DN, Kern AD. Recurrent Adaptation in RNA Interference Genes Across the *Drosophila* Phylogeny. *Mol Biol Evol*. 2011;28:1033–42. doi:10.1093/molbev/msq284.
22. Palmer WH, Hadfield JD, Obbard DJ. RNA-Interference Pathways Display High Rates of Adaptive Protein Evolution in Multiple Invertebrates. *Genetics*. 2018;208:1585–99. doi:10.1534/genetics.117.300567.
23. Marques JT, Carthew RW. A call to arms: coevolution of animal viruses and host innate immune responses. *Trends Genet*. 2007;23:359–64. doi:10.1016/J.TIG.2007.04.004.
24. van Mierlo JT, Overheul GJ, Obadia B, van Cleef KWR, Webster CL, Saleh M-C, et al. Novel *Drosophila* Viruses Encode Host-Specific Suppressors of RNAi. *PLoS Pathog*. 2014;10:e1004256. doi:10.1371/journal.ppat.1004256.
25. Blumenstiel JP, Erwin AA, Hemmer LW. What drives positive selection in the *Drosophila* piRNA machinery? The genomic autoimmunity hypothesis. *Yale J Biol Med*. 2016;89:499–512. <http://www.ncbi.nlm.nih.gov/pubmed/28018141>. Accessed 24 Jul 2017.
26. Dowling D, Pauli T, Donath A, Meusemann K, Podsiadlowski L, Petersen M, et al. Phylogenetic Origin and Diversification of RNAi Pathway Genes in Insects. *Genome Biol Evol*. 2017;1:evw281. doi:10.1093/gbe/evw281.
27. Meisel RP, Hildorfer BB, Koch JL, Lockton S, Schaeffer SW. Adaptive Evolution of Genes Duplicated from the *Drosophila pseudoobscura* neo-X Chromosome. *Mol Biol Evol*. 2010;27:1963–78. doi:10.1093/molbev/msq085.
28. McDonald JH, Kreitman M. Adaptive protein evolution at the *Adh* locus in *Drosophila*. *Nature*. 1991;351:652–654. doi:10.1038/350055a0.
29. Welch JJ. Estimating the genomewide rate of adaptive protein evolution in *Drosophila*. *Genetics*. 2006;173:821–37. doi:10.1534/genetics.106.056911.
30. Charlesworth J, Eyre-Walker A. The McDonald-Kreitman Test and Slightly Deleterious Mutations. *Mol Biol Evol*. 2008;25:1007–15. doi:10.1093/molbev/msn005.
31. Fuller ZL, Haynes GD, Richards S, Schaeffer SW. Genomics of Natural Populations: How Differentially Expressed Genes Shape the Evolution of Chromosomal Inversions in *Drosophila pseudoobscura*. *Genetics*. 2016;204:287–301. doi:10.1534/genetics.116.191429.
32. Campbell CL, Black WC, Hess AM, Foy BD. Comparative genomics of small RNA regulatory pathway components in vector mosquitoes. *BMC Genomics*. 2008;9:425. doi:10.1186/1471-2164-9-425.
33. Longdon B, Wilfert L, Obbard DJ, Jiggins FM. Rhabdoviruses in two species of *Drosophila*: Vertical transmission and a recent sweep. *Genetics*. 2011;188:141–50. doi:10.1534/genetics.111.127696.

34. Rozhkov N V., Aravin AA, Zelentsova ES, Schostak NG, Sachidanandam R, McCombie WR, et al. Small RNA-based silencing strategies for transposons in the process of invading *Drosophila* species. *RNA*. 2010;16:1634–45. doi:10.1261/rna.2217810.
35. Pasyukova, S. Nuzhdin, W. Li E, Nuzhdin S, Li W, Flavell AJ. Germ line transposition of the copia retrotransposon in *Drosophila melanogaster* is restricted to males by tissue-specific control of copia RNA levels. *Mol Gen Genet MGG*. 1997;255:115–24. doi:10.1007/s004380050479.
36. Thomas JH, Schneider S. Coevolution of retroelements and tandem zinc finger genes. *Genome Res*. 2011;21:1800–12. doi:10.1101/gr.121749.111.
37. Jacobs FMJ, Greenberg D, Nguyen N, Haeussler M, Ewing AD, Katzman S, et al. An evolutionary arms race between KRAB zinc-finger genes ZNF91/93 and SVA/L1 retrotransposons. *Nature*. 2014;516:242–5. doi:10.1038/nature13760.
38. Levine MT, Wende Vander HM, Hsieh E, Baker EP, Malik HS. Recurrent gene duplication diversifies genome defense repertoire in *Drosophila*. *Mol Biol*. 2016;33:1–13.
39. Jaenike J. Sex Chromosome Meiotic Drive. *Annu Rev Ecol Syst*. 2001;32:25–49. doi:10.1146/annurev.ecolsys.32.081501.113958.
40. Lindholm AK, Dyer KA, Firman RC, Fishman L, Forstmeier W, Holman L, et al. The Ecology and Evolutionary Dynamics of Meiotic Drive. *Trends Ecol Evol*. 2016;31:315–26. doi:10.1016/J.TREE.2016.02.001.
41. Wen J, Duan H, Bejarano F, Okamura K, Fabian L, Brill JA, et al. Adaptive regulation of testis gene expression and control of male fertility by the *Drosophila* hairpin RNA pathway. [Corrected]. *Mol Cell*. 2015;57:165–78. doi:10.1016/j.molcel.2014.11.025.
42. Mohammed J, Flynt AS, Panzarino AM, Mondal MMH, DeCruz M, Siepel A, et al. Deep experimental profiling of microRNA diversity, deployment, and evolution across the *Drosophila* genus. *Genome Res*. 2018;28:52–65. doi:10.1101/gr.226068.117.
43. Harumoto T, Anbutsu H, Lemaitre B, Fukatsu T. Male-killing symbiont damages host's dosage-compensated sex chromosome to induce embryonic apoptosis. *Nat Commun*. 2016;7:12781. doi:10.1038/ncomms12781.
44. Kaessmann H. Origins, evolution, and phenotypic impact of new genes. *Genome Res*. 2010;20:1313–26. doi:10.1101/gr.101386.109.
45. Altschul SF, Gish W, Miller W, Myers EW, Lipman DJ. Basic local alignment search tool. *J Mol Biol*. 1990;215:403–10. doi:10.1016/S0022-2836(05)80360-2.
46. Hall Thomas. BioEdit: a user-friendly biological sequence alignment editor and analysis program for Windows 95/95/NT. *Oxford Univ*. 1999;41:95–8. doi:citeulike-article-id:691774.
47. St. Pierre SE, Ponting L, Stefancsik R, McQuilton P. FlyBase 102—advanced approaches to interrogating FlyBase. *Nucleic Acids Res*. 2014;42:D780–8. doi:10.1093/nar/gkt1092.
48. English AC, Richards S, Han Y, Wang M, Vee V, Qu J, et al. Mind the Gap: Upgrading Genomes with Pacific Biosciences RS Long-Read Sequencing Technology. *PLoS One*. 2012;7:e47768. doi:10.1371/journal.pone.0047768.
49. Alekseyenko AA, Ellison CE, Gorchakov AA, Zhou Q, Kaiser VB, Toda N, et al. Conservation and de novo acquisition of dosage compensation on newly evolved sex chromosomes in *Drosophila*. *Genes Dev*. 2013;27:853–8. doi:10.1101/gad.215426.113.
50. Zhou Q, Bachtrog D. Sex-specific adaptation drives early sex chromosome evolution in *Drosophila*. *Science* (80- ). 2012;337:341–5. doi:10.1126/science.1225385.

537 51. Drosophila 12 Genomes Consortium AG, Clark AG, Eisen MB, Smith DR, Bergman CM,  
538 Oliver B, et al. Evolution of genes and genomes on the Drosophila phylogeny. *Nature*.  
539 2007;450:203–18. doi:10.1038/nature06341.

540 52. Palmieri N, Kosiol C, Schlötterer C. The life cycle of Drosophila orphan genes. *Elife*.  
541 2014;3:e01311. doi:10.7554/eLife.01311.

542 53. McGaugh SE, Heil CSS, Manzano-Winkler B, Loewe L, Goldstein S, Himmel TL, et al.  
543 Recombination Modulates How Selection Affects Linked Sites in Drosophila. *PLoS Biol*.  
544 2012;10:e1001422. doi:10.1371/journal.pbio.1001422.

545 54. Webster CL, Waldron FM, Robertson S, Crowson D, Ferrari G, Quintana JF, et al. The  
546 Discovery, Distribution, and Evolution of Viruses Associated with Drosophila melanogaster.  
547 *PLOS Biol*. 2015;13:e1002210. doi:10.1371/journal.pbio.1002210.

548 55. Grabherr MG, Haas BJ, Yassour M, Levin JZ, Thompson DA, Amit I, et al. Full-length  
549 transcriptome assembly from RNA-Seq data without a reference genome. *Nat Biotechnol*.  
550 2011;29:644–52.

551 56. Wong Miller KM, Bracewell RR, Eisen MB, Bachtrog D. Patterns of Genome-Wide  
552 Diversity and Population Structure in the Drosophila athabasca Species Complex. *Mol Biol*  
553 *Evol*. 2017. doi:10.1093/molbev/msx134.

554 57. Buchfink B, Xie C, Huson DH. Fast and sensitive protein alignment using DIAMOND. *Nat*  
555 *Methods*. 2014;12:59–60. doi:10.1038/nmeth.3176.

556 58. Nurk S, Bankevich A, Antipov D, Gurevich A, Korobeynikov A, Lapidus A, et al.  
557 Assembling genomes and mini-metagenomes from highly chimeric reads. In: *Lecture Notes*  
558 *in Computer Science (including subseries Lecture Notes in Artificial Intelligence and Lecture*  
559 *Notes in Bioinformatics)*. Springer, Berlin, Heidelberg; 2013. p. 158–70. doi:10.1007/978-3-  
560 642-37195-0\_13.

561 59. Thompson JD, Higgins DG, Gibson TJ. CLUSTAL W: Improving the sensitivity of  
562 progressive multiple sequence alignment through sequence weighting, position-specific gap  
563 penalties and weight matrix choice. *Nucleic Acids Res*. 1994;22:4673–80.  
564 doi:10.1093/nar/22.22.4673.

565 60. Drummond AJ, Rambaut A. BEAST: Bayesian evolutionary analysis by sampling trees.  
566 *BMC Evol Biol*. 2007;7:214. doi:10.1186/1471-2148-7-214.

567 61. Rambaut A. Tracer v1.6. <http://tree.bio.ed.ac.uk/software/tracer/>. 2013.

568 62. R Core Team. R: A language and environment for statistical computing. R Foundation  
569 for Statistical Computing, Vienna, Austria. 2016. <https://www.r-project.org/>.

570 63. Chen Z-X, Sturgill D, Qu J, Jiang H, Park S, Boley N, et al. Comparative validation of the  
571 *D. melanogaster* modENCODE transcriptome annotation. *Genome Res*. 2014;24:1209–23.  
572 doi:10.1101/gr.159384.113.

573 64. VanKuren NW, Vibranovski MD. A novel dataset for identifying sex-biased genes in  
574 Drosophila. *J genomics*. 2014;2:64–7. doi:10.7150/jgen.7955.

575 65. Nyberg KG, Machado CA. Comparative Expression Dynamics of Intergenic Long  
576 Noncoding RNAs in the Genus *Drosophila*. *Genome Biol Evol*. 2016;8:1839–58.  
577 doi:10.1093/gbe/evw116.

578 66. Gomes S, Civetta A. Hybrid male sterility and genome-wide misexpression of male  
579 reproductive proteases. *Sci Rep*. 2015;5:11976. doi:10.1038/srep11976.

580 67. Langmead B, Trapnell C, Pop M, Salzberg SL. Ultrafast and memory-efficient alignment  
581 of short DNA sequences to the human genome. *Genome Biol*. 2009;10:R25. doi:10.1186/gb-



2009-10-3-r25.

68. Li H, Handsaker B, Wysoker A, Fennell T, Ruan J, Homer N, et al. The Sequence Alignment/Map format and SAMtools. *Bioinformatics*. 2009;25:2078–9. doi:10.1093/bioinformatics/btp352.

69. Hadfield JD. MCMC Methods for Multi-Response Generalized Linear Mixed Models: The MCMCglmm R Package. *J Stat Softw*. 2010;33:1–22. doi:10.18637/jss.v033.i02.

70. Smukowski Heil CS, Ellison C, Dubin M, Noor MAF. Recombining without Hotspots: A Comprehensive Evolutionary Portrait of Recombination in Two Closely Related Species of *Drosophila*. *Genome Biol Evol*. 2015;7:2829–42. doi:10.1093/gbe/evv182.

71. Van der Auwera GA, Carneiro MO, Hartl C, Poplin R, del Angel G, Levy-Moonshine A, et al. From fastQ data to high-confidence variant calls: The genome analysis toolkit best practices pipeline. *Curr Protoc Bioinforma*. 2013; SUPPL.43:11.10.1-11.10.33. doi:10.1002/0471250953.bi1110s43.

72. Li H. A statistical framework for SNP calling, mutation discovery, association mapping and population genetical parameter estimation from sequencing data. *Bioinformatics*. 2011;27:2987–93. doi:10.1093/bioinformatics/btr509.

73. Danecek P, Auton A, Abecasis G, Albers CA, Banks E, DePristo MA, et al. The variant call format and VCFtools. *Bioinformatics*. 2011;27:2156–8. doi:10.1093/bioinformatics/btr330.

74. Scheet P, Stephens M. A Fast and Flexible Statistical Model for Large-Scale Population Genotype Data: Applications to Inferring Missing Genotypes and Haplotypic Phase. *Am J Hum Genet*. 2006;78:629–44. www.ajhg.org. Accessed 17 Jul 2017.

75. Librado P, Rozas J. DnaSP v5: a software for comprehensive analysis of DNA polymorphism data. *Bioinformatics*. 2009;25:1451–2. doi:10.1093/bioinformatics/btp187.

76. Leader DP, Krause SA, Pandit A, Davies SA, Dow JAT. FlyAtlas 2: a new version of the *Drosophila melanogaster* expression atlas with RNA-Seq, miRNA-Seq and sex-specific data. *Nucleic Acids Res*. 2018;46:D809–15. doi:10.1093/nar/gkx976.

77. Mohn F, Sienski G, Handler D, Brennecke J. The Rhino-Deadlock-Cutoff Complex Licenses Noncanonical Transcription of Dual-Strand piRNA Clusters in *Drosophila*. *Cell*. 2014;157:1364–79. doi:10.1016/j.cell.2014.04.031.

78. Zamparini AL, Davis MY, Malone CD, Vieira E, Zavadil J, Sachidanandam R, et al. Vreteno, a gonad-specific protein, is essential for germline development and primary piRNA biogenesis in *Drosophila*. *Development*. 2011;138:4039–50. doi:10.1242/dev.069187.

79. Saito K, Ishizu H, Komai M, Kotani H, Kawamura Y, Nishida KM, et al. Roles for the Yb body components Armitage and Yb in primary piRNA biogenesis in *Drosophila*. *Genes Dev*. 2010;24:2493–8. doi:10.1101/gad.1989510.

80. Vourekas A, Zheng K, Fu Q, Maragkakis M, Alexiou P, Ma J, et al. The RNA helicase MOV10L1 binds piRNA precursors to initiate piRNA processing. *Genes Dev*. 2015;29:617–29. doi:10.1101/gad.254631.114.

81. Patil VS, Kai T. Repression of Retroelements in *Drosophila* Germline via piRNA Pathway by the Tudor Domain Protein Tejas. *Curr Biol*. 2010;20:724–30. doi:10.1016/j.cub.2010.02.046.

82. Ohtani H, Iwasaki YW, Shibuya A, Siomi H, Siomi MC, Saito K. DmGTSF1 is necessary for Piwi-piRISC-mediated transcriptional transposon silencing in the *Drosophila* ovary. *Genes Dev*. 2013;27:1656–61. doi:10.1101/gad.221515.113.

- 627 83. Dönertas D, Sienski G, Brennecke J. Drosophila Gtsf1 is an essential component of the  
628 Piwi-mediated transcriptional silencing complex. Genes Dev. 2013;27:1693–705.  
629 doi:10.1101/gad.221150.113.
- 630 84. Sato K, Siomi MC. Functional and structural insights into the piRNA factor Maelstrom.  
631 FEBS Lett. 2015;589:1688–93. doi:10.1016/j.febslet.2015.03.023.
- 632 85. Li WH. Unbiased estimation of the rates of synonymous and nonsynonymous  
633 substitution. Journal of Molecular Evolution. 1993;36:96–9. doi:10.1007/BF02407308.
- 634

## Figures

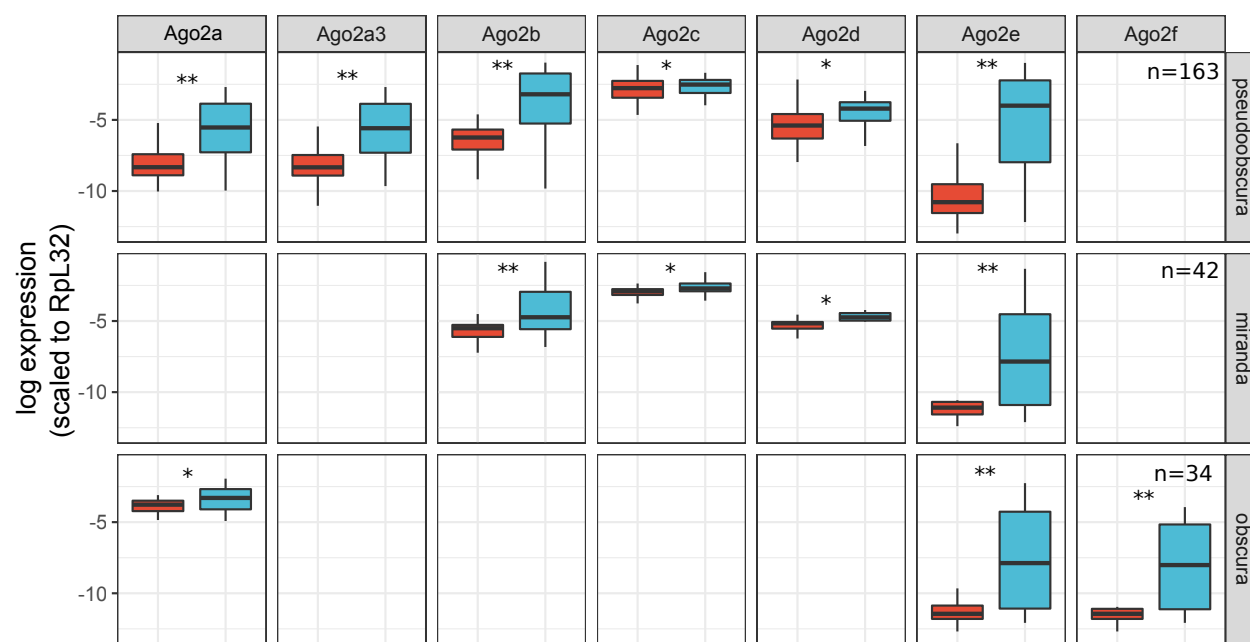

**Figure 1 Expression Profile of Argonaute 2**

Plots show the difference in expression between female (red) and male (blue) flies, based on public RNAseq data, normalized to rpL32 and plotted on a natural log scale. The significance of differences between the sexes was assessed using a linear model fitted with MCMCglmm and is denoted by asterisks: \* 0.001 < pMCMC < 0.05; \*\* pMCMC <= 0.001. Sample size (n) represents the number of RNAseq datasets used (combined across tissues). *Ago2d* is the ancestral copy in *Dpse* and *Dmir*, *Ago2a* is the ancestral copy in *D. obscura* and *Ago2a* is recently duplicated in *Dpse* become *Ago2a1* (*Ago2a*) and *Ago2a3*.



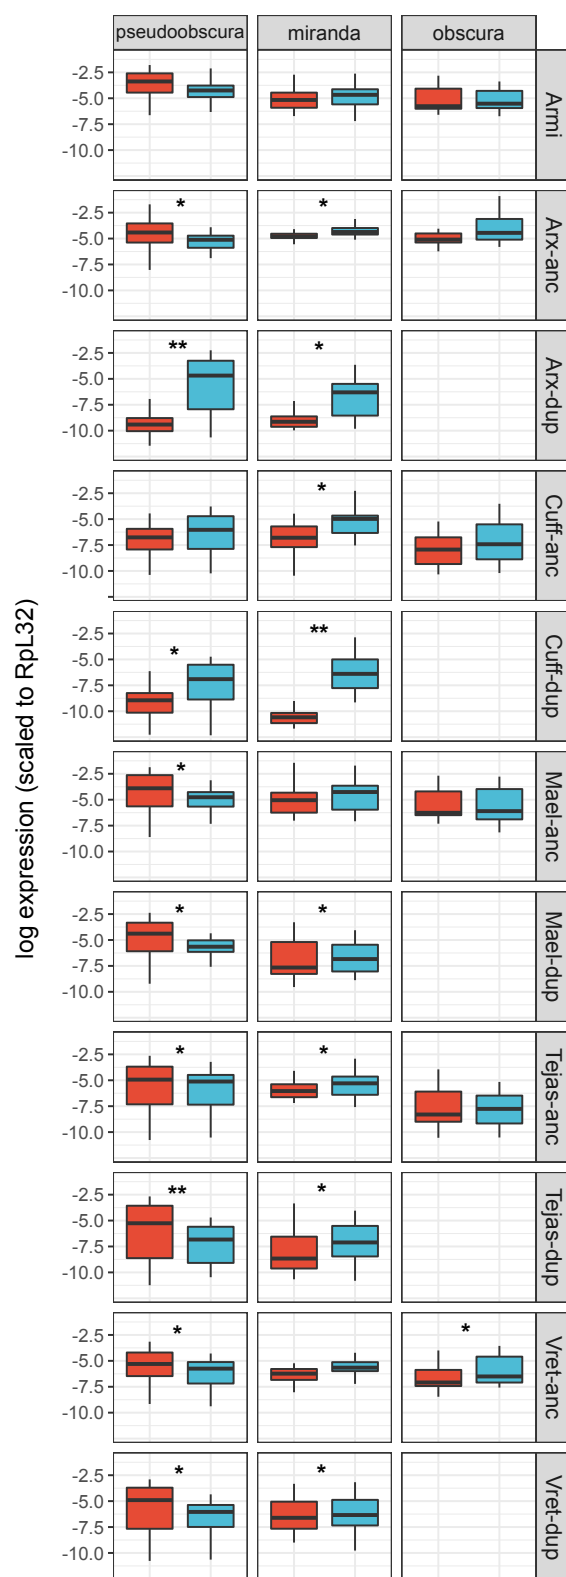

**Figure 2 The expression profile of RNAi-accessory protein genes**

Plots show the expression pattern between sex (male: blue, female:red) for genes other than *Ago2*; 'anc' ancestral copy, 'dup' duplicate copy as inferred by synteny. The y-axis is the natural log of normalized expression. The significance between sexes is denoted by \* (0.001 < pMCMC < 0.05) and \*\* (pMCMC < 0.001). Sample sizes are the same as **Figure 1**.



#### **Figure 4 Bayesian Relaxed Clock Trees for 6 RNAi accessory protein genes**

Ancestral genes are marked by bold blue, duplicates in bold red. Yellow diamonds indicate duplication events. Species other than *obscura* group are collapsed (green triangle; melanogaster group and brown triangle: other *Drosophila* species). Posterior Bayesian Supports are only shown in the nodes with support less than 1. Duplicated genes which could not be assigned as ancestral or duplicate is marked by \_1 or \_2. Scale axis is in the time relative to the *obscura* speciation, which was set to 1.

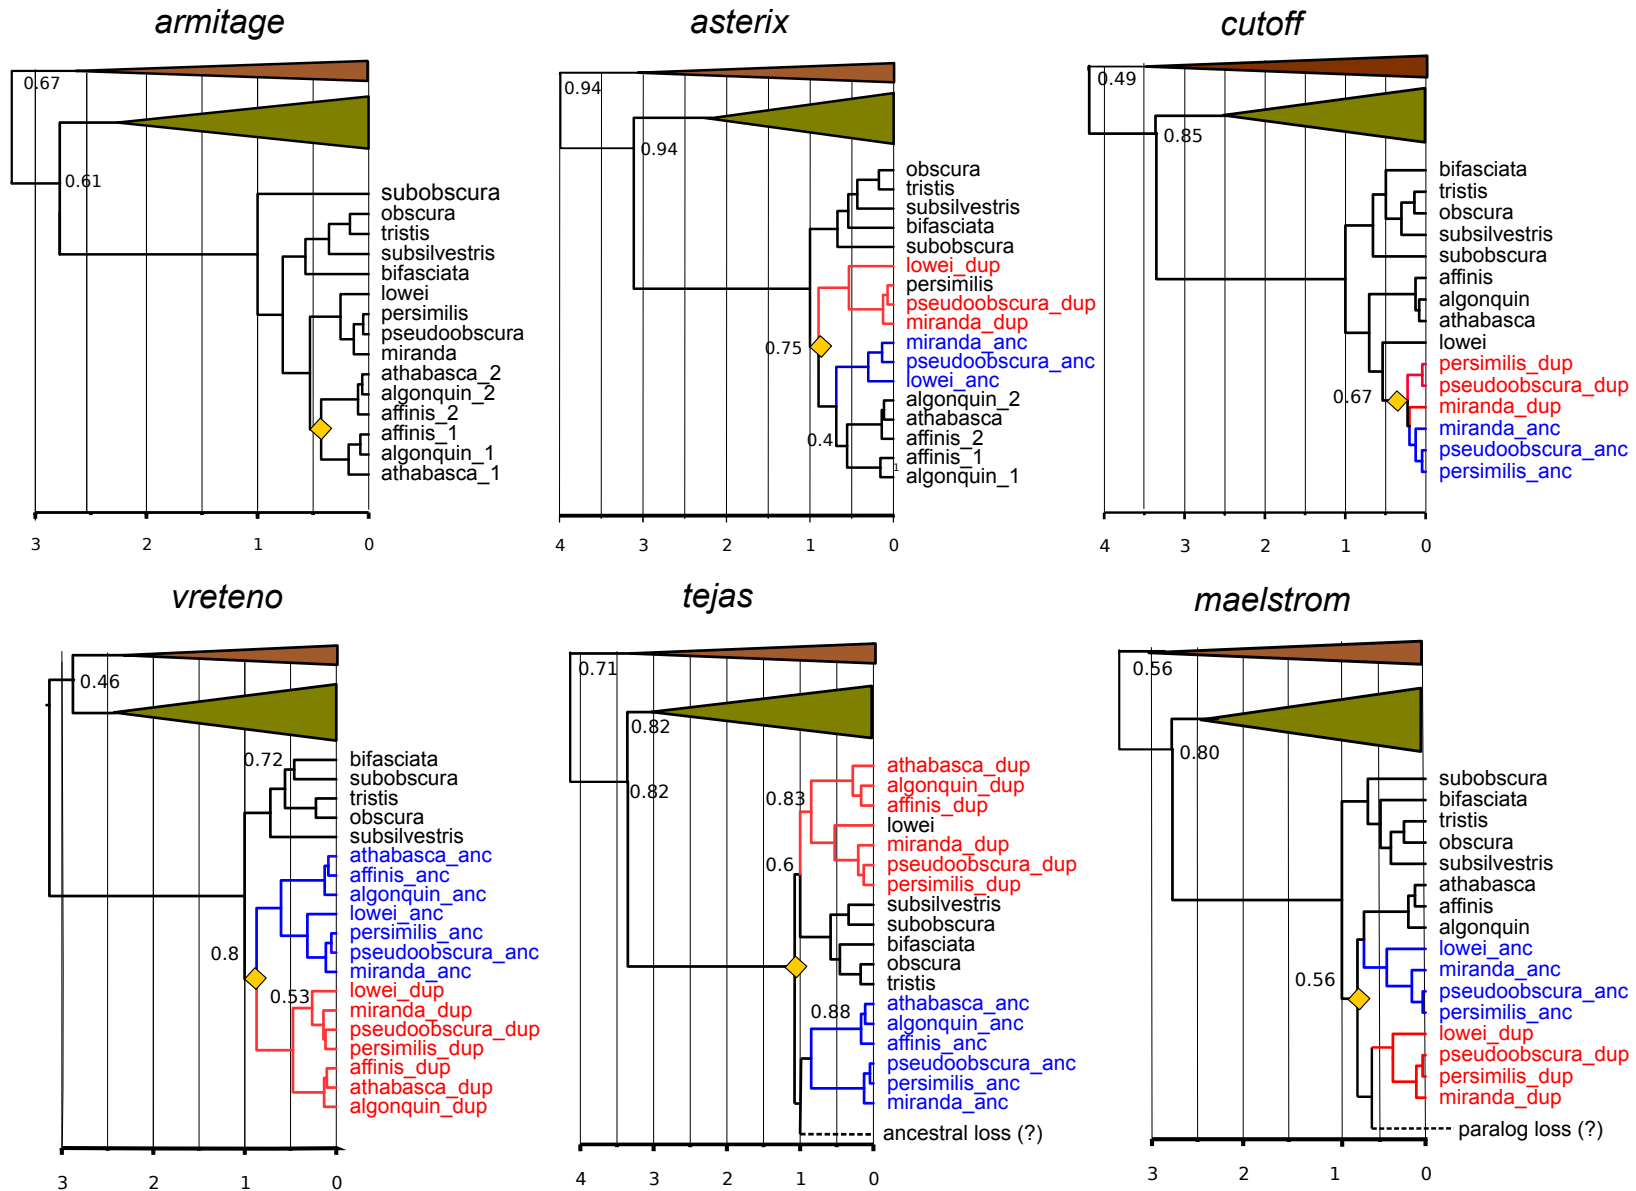

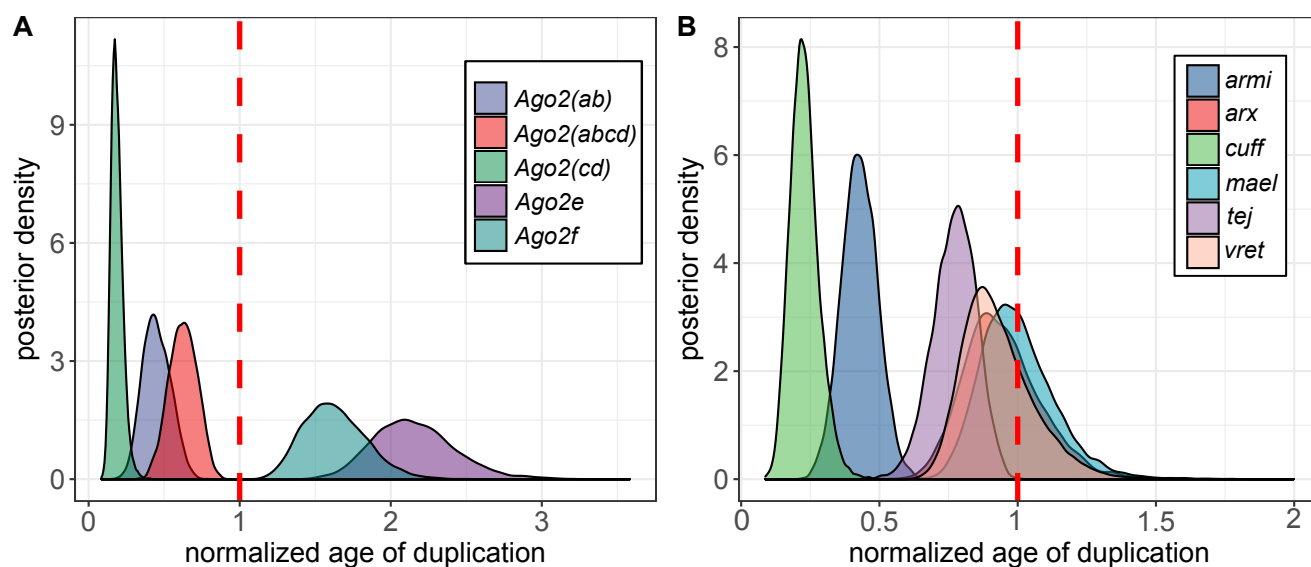

**Figure 5 Density plot for posterior distributions of the duplication age**

The MCMC posterior of the age of duplication node after 25% burn-in. **(A)** *Argounate 2* and **(B)** RNAi accessory proteins. The broken red line denotes speciation event in *obscura* group which was normalised to be 1.

## Tables

**Table 1 The details of RNAi accessory genes duplicated in the obscura group as reported by Palmer *et al.* [22]**

\*The tissue gene expression in *Dmel* is based on the FlyAtlas2 [76]. We report tissues with enrichment > 0.4.

| Gene                                | Involvement in piRNA pathway                 | Function of the protein product                                                                                                                                                             | Tissue expression in <i>Dmel</i>                             | Reference    |
|-------------------------------------|----------------------------------------------|---------------------------------------------------------------------------------------------------------------------------------------------------------------------------------------------|--------------------------------------------------------------|--------------|
| <i>cutoff</i><br>( <i>cuff</i> )    | piRNA transcription                          | Forms a complex with Rhino-Deadlock-Cutoff (Rhi-Del-Cuff) to protect uncapped non-canonical (dual-strand cluster) piRNA transcript from degradation, splicing and transcription termination | testis                                                       | [77]         |
| <i>vreteno</i><br>( <i>vret</i> )   | piRNA biogenesis                             | A Tudor-domain protein which essential for an early primary piRNA processing                                                                                                                | larval brain, adult female salivary gland, ovary, testis     | [78]         |
| <i>armitage</i><br>( <i>armi</i> )  | piRNA biogenesis                             | A RNA helicase which unwinds the piRNA intermediates before loading into Piwi                                                                                                               | ubiquitously expressed                                       | [79]<br>[80] |
| <i>tejas</i><br>( <i>tej</i> )      | Secondary piRNA production (Ping-pong cycle) | A Tudor-domain protein which physically interact with <i>Vas</i> , <i>Spn-E</i> and <i>Aub</i> for a proper ping-pong cycle in the <i>nuage</i>                                             | testis, accessory glands, adult female salivary gland, ovary | [81]         |
| <i>asterix</i><br>( <i>arx</i> )    | TGS (Transcriptional Gene Silencing)         | A zinc-finger protein which directly interacts with Piwi to scan and identify the transposon transcriptions as target for histone modifications                                             | ubiquitously expressed                                       | [82]<br>[83] |
| <i>maelstrom</i><br>( <i>mael</i> ) | TGS                                          | Act downstream of Piwi to establish histone modification and prevent the spreading of the silencing marker to the surrounding genes                                                         | brain, testis, adult female salivary gland, ovary            | [84]         |

**Table 2 Joint estimates of adaptive evolution across genes**

Maximum-likelihood extension of MK test model fitted with different constraints on  $\alpha$  [29]. LnL is the log likelihood of the model, AIC is the Akaike Information Criterion with corresponding relative probability as Akaike Weight ( $w_i$ ). The most supported model is in bold.

| Model     | Model description                                                                                                                      | LnL             | AICc            | Akaike weight( $w_i$ ) | Maximum likelihood $\alpha$ estimate |              |
|-----------|----------------------------------------------------------------------------------------------------------------------------------------|-----------------|-----------------|------------------------|--------------------------------------|--------------|
|           |                                                                                                                                        |                 |                 |                        | ancestral                            | duplicate    |
| M0        | $\alpha\text{-anc}=0, \alpha\text{-dup}=0$                                                                                             | -300.61         | 633.2207        | $4.00 \times 10^{-12}$ | 0                                    | 0            |
| M1        | $\alpha\text{-anc} > 0, \alpha\text{-dup} > 0$<br>$\alpha\text{-anc} = \alpha\text{-dup}$                                              | -284.105        | 602.2092        | $2.6 \times 10^{-05}$  | 0.539                                | 0.539        |
| M2        | $\alpha\text{-anc} > 0, \alpha\text{-dup}=0$                                                                                           | -301.857        | 637.7133        | $5.10 \times 10^{-13}$ | 0.047                                | 0            |
| M3        | $\alpha\text{-anc}=0, \alpha\text{-dup} > 0$                                                                                           | -275.249        | 584.4975        | 0.186                  | 0                                    | 0.618        |
| <b>M4</b> | <b><math>\alpha\text{-anc} &gt; 0, \alpha\text{-dup} &gt; 0</math></b><br><b><math>\alpha\text{-anc} \neq \alpha\text{-dup}</math></b> | <b>-272.774</b> | <b>581.5471</b> | <b>0.813</b>           | <b>0.2</b>                           | <b>0.676</b> |

## Additional files

### Additional file 1 Table S1

File format: xlsx

Title: **The detailed RNAi genes and its duplicate in *D. pseudoobscura***

Description: The genomic position is based on the *D. pseudoobscura* assembly 3.0

| Gene             | Flybase ID  | Locus Tag | Chromosomal location | Muller Element | Start Position | Gene length | Duplication mechanism  |
|------------------|-------------|-----------|----------------------|----------------|----------------|-------------|------------------------|
| Armi             | FBgn0246685 | GA25304   | 4_group1             | D              | 981803         | 3507        |                        |
| Arx-ancestral    | FBgn0077765 | GA17756   | XR_group8            | D              | 6958861        | 495         |                        |
| Arx-duplicate    | FBgn0247462 | GA26086   | 4_group3             | B              | 10387204       | 501         | Retrotransposition     |
| Cuff-ancestral   | FBgn0246456 | GA25073   | 3                    | C              | 17023607       | 1113        |                        |
| Cuff-duplicate   | FBgn0244163 | GA22760   | XL_group1a           | A              | 3011154        | 1119        | Direct DNA duplication |
| Tejas-ancestral  | FBgn0081173 | GA21185   | 3                    | C              | 17440474       | 1782        |                        |
| Tejas-duplicate  | FBgn0248235 | GA26863   | 2                    | E              | 1079477        | 1413        | Retrotransposition     |
| Vret-ancestral   | FBgn0078422 | GA18420   | 2                    | E              | 6266048        | 2085        |                        |
| Vret-duplicate   | FBgn0244928 | GA23527   | XL_group1e           | A              | 10126307       | 2110        |                        |
| Mael-ancestral   | FBgn0248264 | GA26892   | 2                    | E              | 54104          | 1314        |                        |
| Mael-duplicate   | FBgn0249827 | GA28467   | XR_group8            | D              | 396866         | 1113        | Direct DNA duplication |
| Ago2a            | FBgn0249477 | GA28114   | Unknown_group_265    |                | 16703          | 2008        | Direct DNA duplication |
| Ago2b            | FBgn0248821 | GA27454   | 2                    | E              | 23856171       | 2940        | Direct DNA duplication |
| Ago2c            | FBgn0248778 | GA27411   | 2                    | E              | 21862037       | 2915        | Direct DNA duplication |
| Ago2d(ancestral) | FBgn0245029 | GA23629   | XR_group6            | D              | 200896         | 2839        |                        |
| Ago2e            | FBgn0247385 | GA23629   | 4_group3             | B              | 6716295        | 2285        | Direct DNA duplication |



## Additional file 2 Figure S1

File format: pdf

Title: **The expression profile of RNAi across tissue**

Description: The normalized expression plotted across tissues. The error bars denote the standard error for the given tissue. Blue bar indicates male and female is indicated by red bar. The plot is shown for *D. pseudoobscura* (n=163), *D. miranda* (n=42) and *D. obscura* (n=34), respectively.

# *D. pseudoobscura*

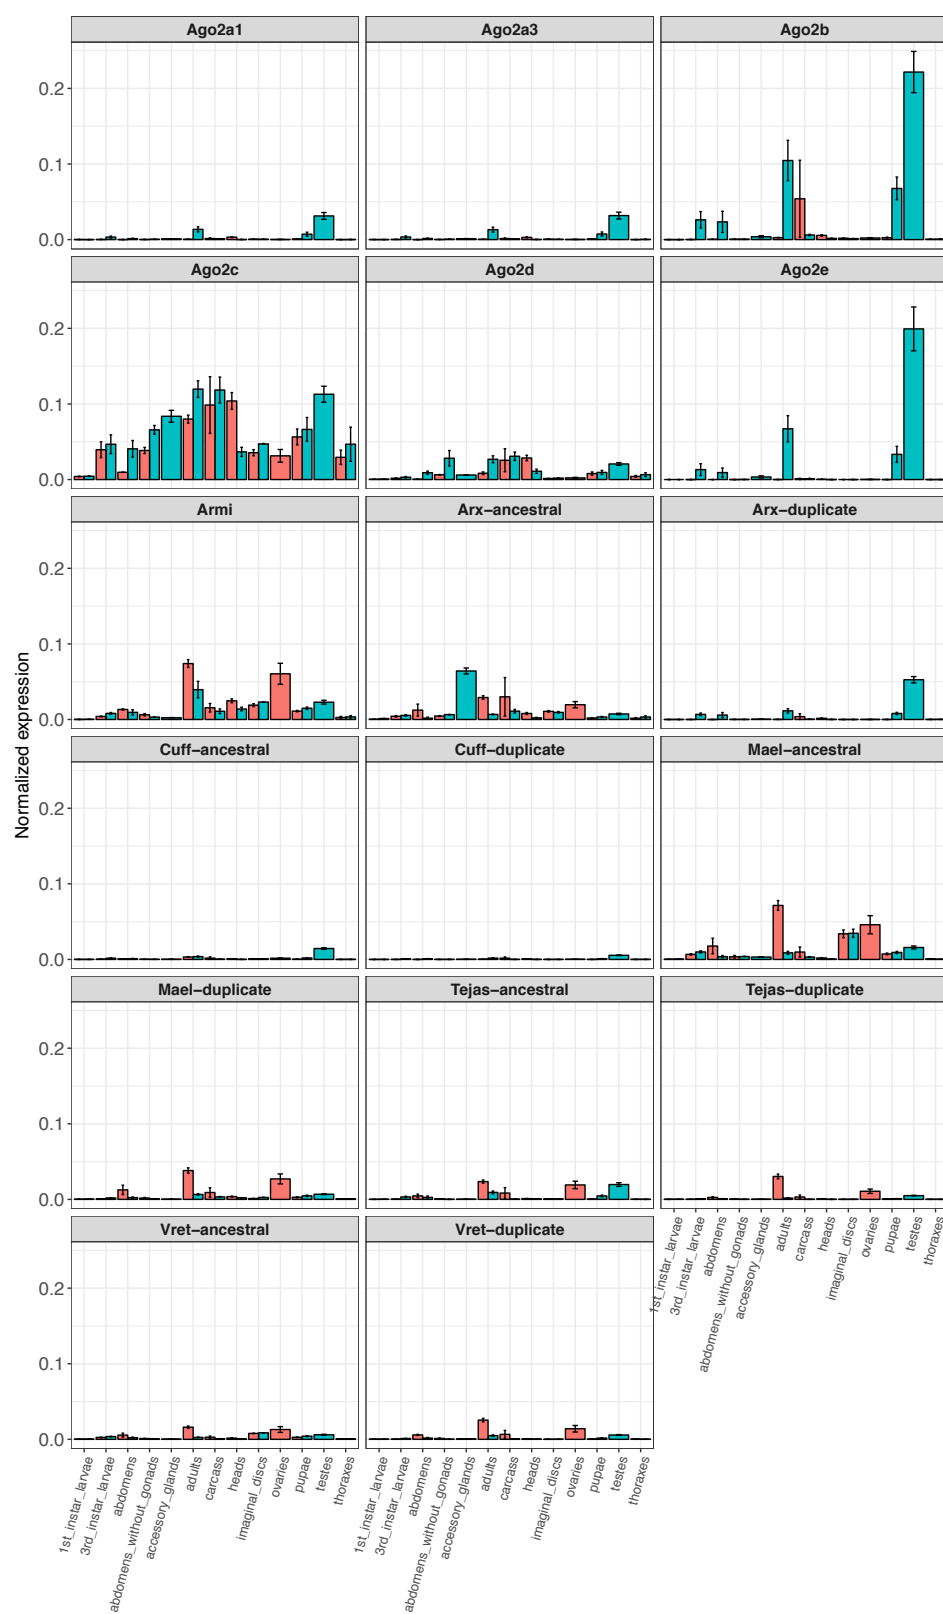

# *D. miranda*

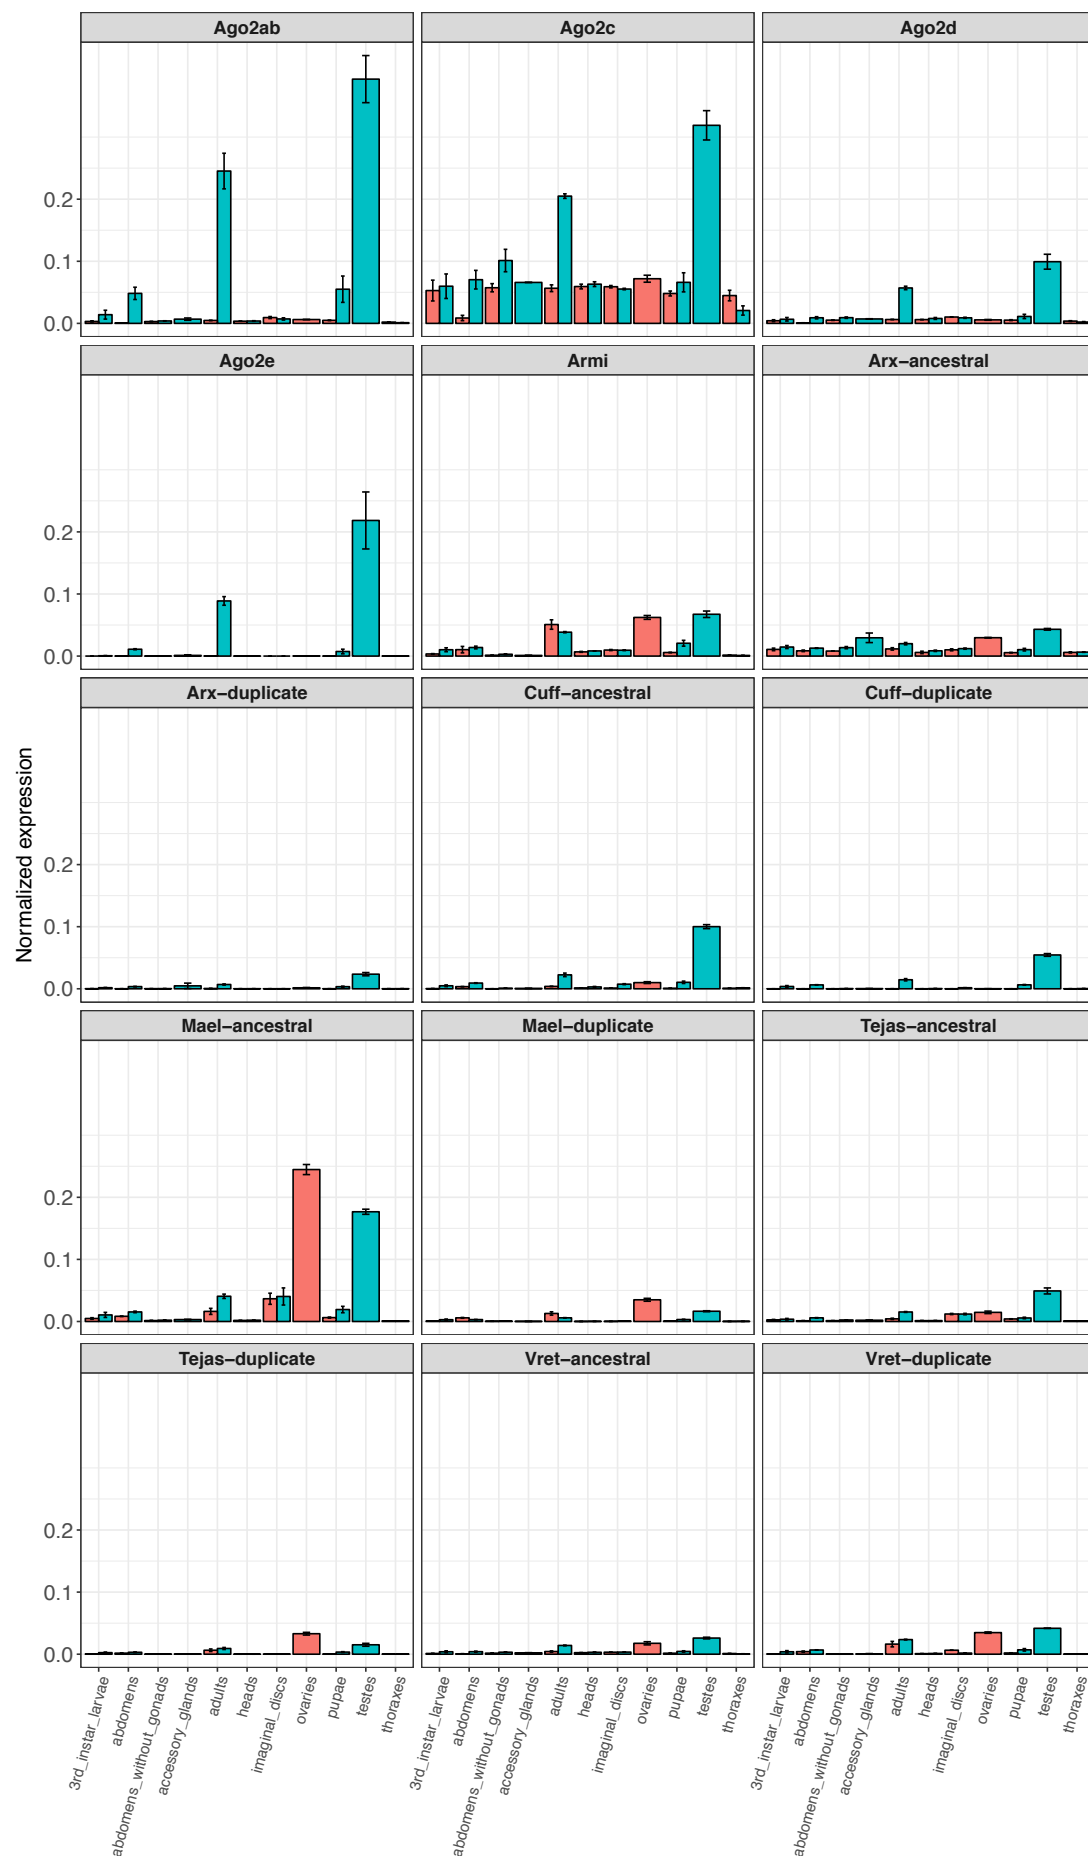

# *D. obscura*

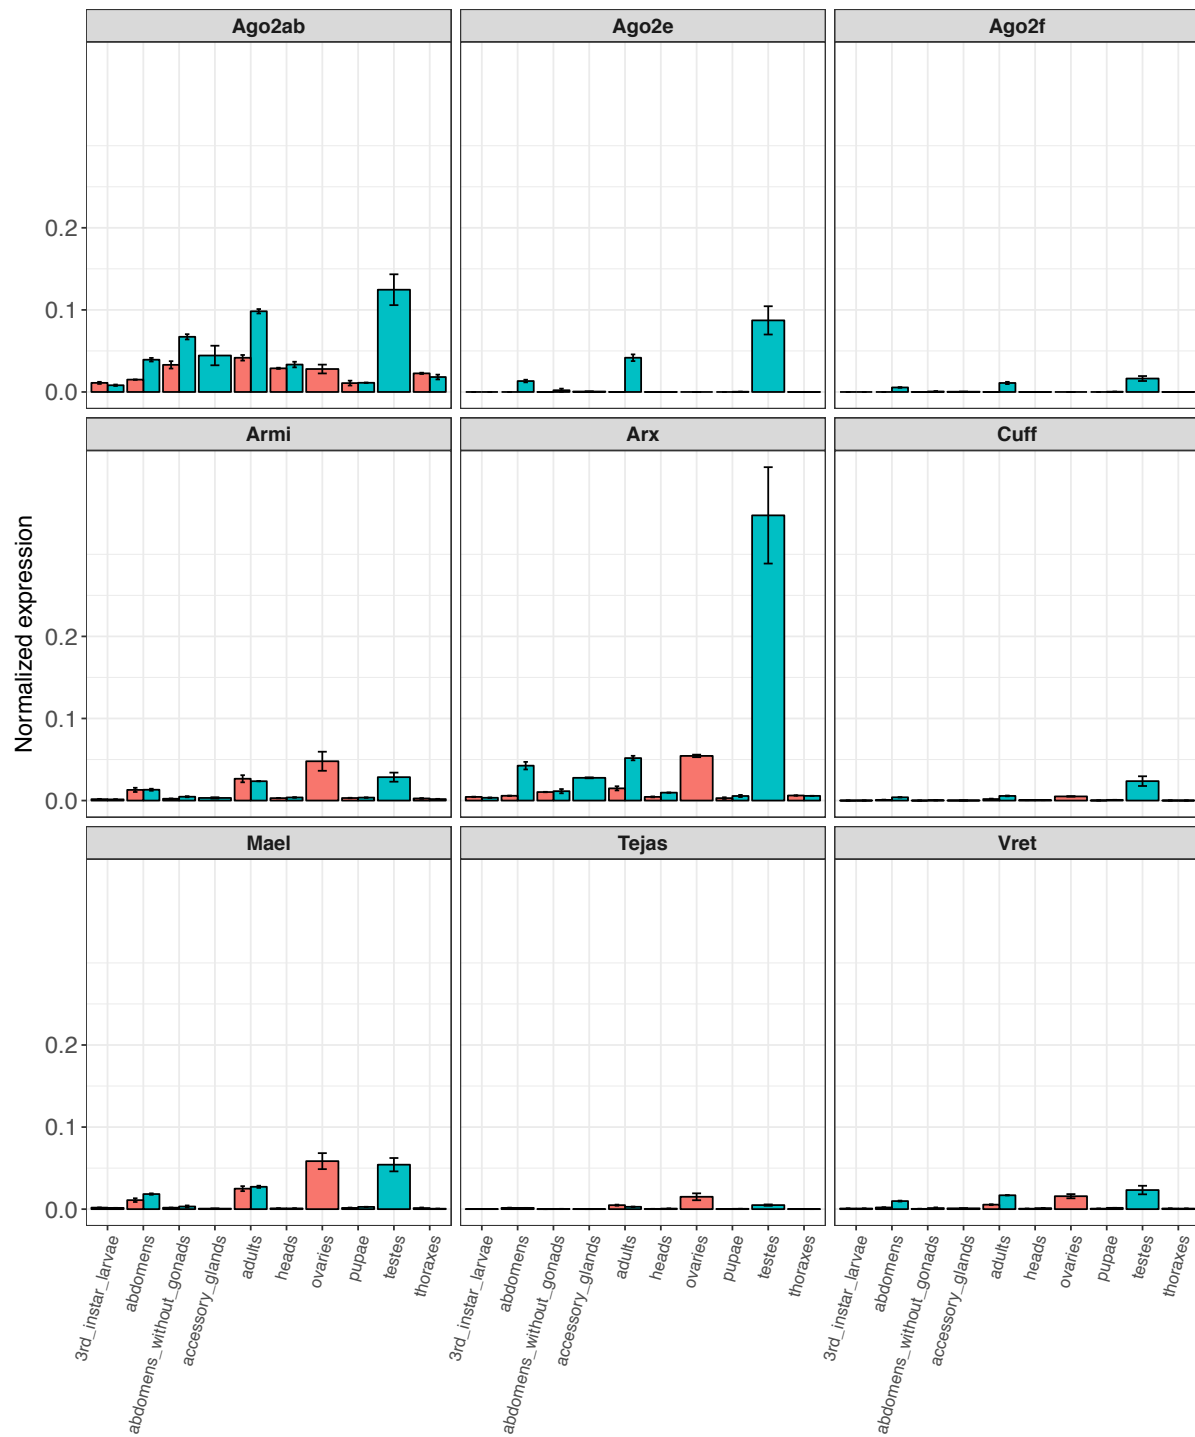

### Additional file 3 Table S2

File format: xlsx

Title: **MK test of duplicated RNAi genes in *D. pseudoobscura*-*D. miranda***

Description: Ds is synonymous divergence, Dn is non-synonymous divergence, Pn is the non-synonymous polymorphisms, Ps is the synonymous polymorphisms,  $\alpha$  represents proportion of substitutions that are adaptive, a is the absolute number of adaptive substitution. Ln is the number of non-synonymous sites, Ls is the number of synonymous sites. Ka is the number of non-synonymous mutations per non-synonymous sites and Ks the number of synonymous mutations per synonymous sites from single randomly chosen strain for each species (Li, 1993 [85] calculated using R package seqinr). Parameter  $\omega_a$  is identical to Ka/Ks ratio except that the numerator only takes adaptive divergence ( $\alpha * Dn$ )/Ln)/(Ds/Ls).

| Gene                   | Ds | Dn | Ps | Pn | alpha( $\alpha$ ) | Fisher p-value | A  | Ln      | Ls     | Ka     | Ks     | Ka/Ks        | $\omega_a$   |
|------------------------|----|----|----|----|-------------------|----------------|----|---------|--------|--------|--------|--------------|--------------|
| Armi                   | 34 | 72 | 22 | 30 | 0.356             | 0.220          | 26 | 2639.83 | 810.17 | 0.0380 | 0.0538 | 0.707        | 0.252        |
| <b>Arx-ancestral</b>   | 2  | 9  | 7  | 4  | <b>0.905</b>      | <b>0.017</b>   | 8  | 383.67  | 102.33 | 0.0246 | 0.0232 | <b>1.059</b> | <b>0.958</b> |
| Arx-duplicate          | 3  | 5  | 10 | 10 | 0.400             | 0.680          | 2  | 386.67  | 105.33 | 0.0204 | 0.0400 | 0.509        | 0.204        |
| <b>Cuff-ancestral</b>  | 5  | 29 | 10 | 10 | <b>0.828</b>      | <b>0.010</b>   | 24 | 863.67  | 255.33 | 0.0352 | 0.0275 | <b>1.281</b> | <b>1.060</b> |
| <b>Cuff-duplicate</b>  | 6  | 39 | 14 | 17 | <b>0.813</b>      | <b>0.003</b>   | 32 | 856.83  | 250.17 | 0.0297 | 0.0417 | <b>0.714</b> | <b>0.580</b> |
| Tejas-ancestral        | 11 | 24 | 10 | 23 | -0.054            | 1.000          | 0  | 1082.17 | 312.83 | 0.0312 | 0.0293 | 1.067        | 0.000        |
| <b>Tejas-duplicate</b> | 16 | 68 | 9  | 13 | <b>0.660</b>      | <b>0.046</b>   | 45 | 1264.83 | 379.17 | 0.0222 | 0.0352 | <b>0.631</b> | <b>0.416</b> |
| Mael-ancestral         | 8  | 27 | 9  | 22 | 0.276             | 0.586          | 7  | 1001.67 | 303.33 | 0.0312 | 0.0293 | 1.067        | 0.294        |
| <b>Mael-duplicate</b>  | 4  | 28 | 11 | 13 | <b>0.831</b>      | <b>0.007</b>   | 23 | 865.67  | 247.33 | 0.0323 | 0.0162 | <b>2.000</b> | <b>1.662</b> |
| Vret-ancestral         | 17 | 34 | 37 | 70 | 0.054             | 1.000          | 2  | 1610.33 | 471.67 | 0.0211 | 0.0360 | 0.586        | 0.032        |
| <b>Vret-duplicate</b>  | 25 | 65 | 23 | 26 | <b>0.565</b>      | <b>0.027</b>   | 37 | 1582.83 | 466.17 | 0.0517 | 0.0617 | <b>0.838</b> | <b>0.473</b> |
| <b>Ago2b</b>           | 41 | 52 | 3  | 12 | <b>-2.154</b>     | <b>0.097</b>   | 0  | 882.00  | 264.00 | 0.0590 | 0.1553 | <b>0.380</b> | <b>0.000</b> |
| Ago2c                  | 2  | 34 | 2  | 22 | 0.353             | 1.000          | 12 | 1571.83 | 483.17 | 0.0216 | 0.0041 | 5.226        | 1.845        |
| Ago2d                  | 27 | 44 | 5  | 16 | -0.964            | 0.300          | 0  | 1228.83 | 367.17 | 0.0358 | 0.0735 | 0.487        | 0.000        |
| <b>Ago2e</b>           | 3  | 18 | 54 | 16 | <b>0.951</b>      | <b>0.000</b>   | 17 | 1410.17 | 464.83 | 0.0128 | 0.0065 | <b>1.978</b> | <b>1.881</b> |

## Additional file 5 Figure S2

File format: pdf

Title: **The heat-map p-value of the difference between pairwise posterior distributions**

Description: Large p-value ( $>0.05$ ) indicates the overlapping distribution and the duplication time might be shared (blue box). Red boxes denote comparison with p-value  $< 0.05$  which indicate non-overlapping posterior distribution and an asynchronous duplication events. Pink colored box indicates the marginally significant ( $0.01 < \text{p-value} < 0.05$ ).

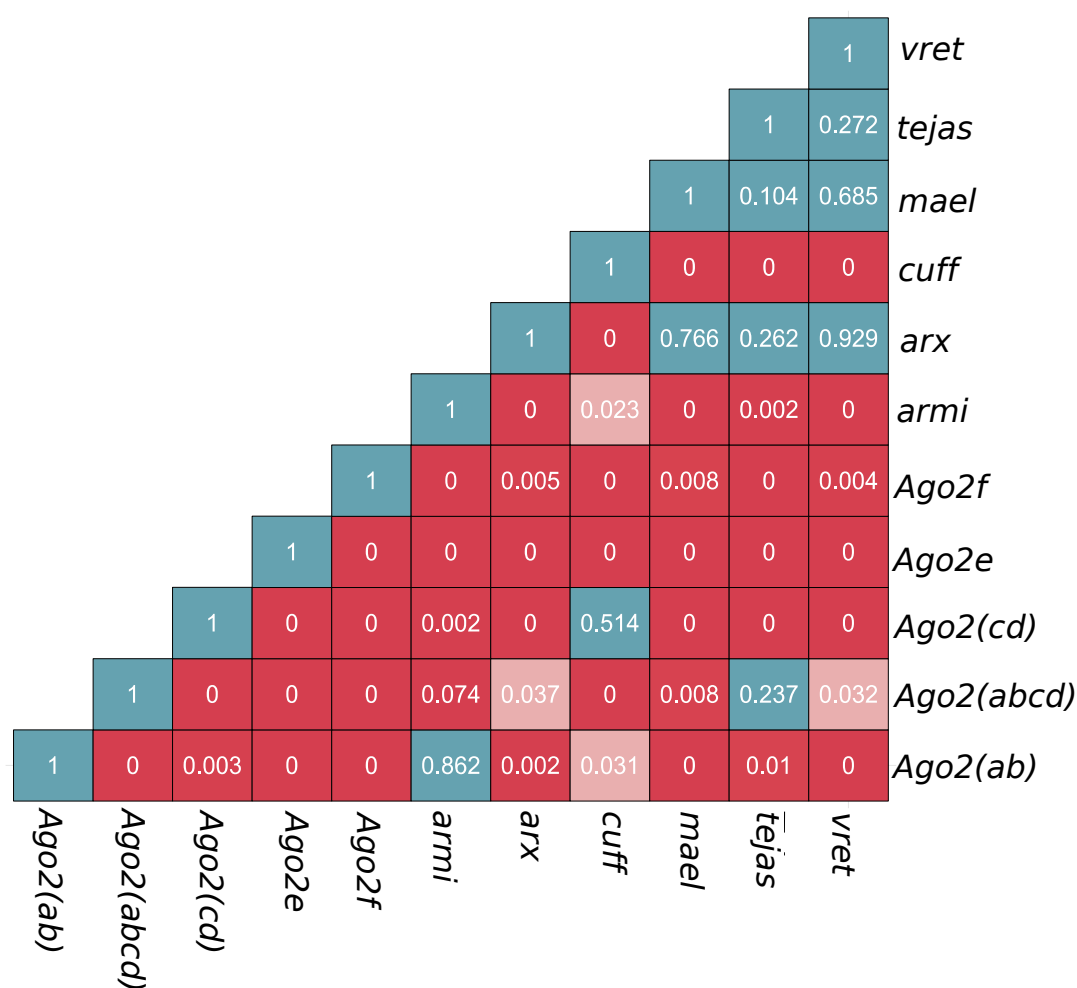

### Additional file 6 Table S3

File format: multiple-tab xlsx

Title: **Additional MK test analysis**

Description: Table the results of additional MK test analysis where minor allele frequency is removed, repetition with larger dataset and results in *D. melanogaster*

**Table 1 MK test result in *D. pseudoobscura* with MAF < 12.5% removed**

| Gene                  | Ds        | Dn        | Ps        | Pn       | $\alpha$     | Fisher p-value  |
|-----------------------|-----------|-----------|-----------|----------|--------------|-----------------|
| Armi                  | 38        | 74        | 7         | 11       | 0.193        | 0.79            |
| <b>Arx-ancestral</b>  | <b>2</b>  | <b>9</b>  | <b>3</b>  | <b>0</b> | <b>1</b>     | <b>0.0274</b>   |
| Arx-duplicate         | 3         | 5         | 1         | 1        | 0.4          | 1               |
| Cuff-ancestral        | 5         | 29        | 2         | 8        | 0.31         | 1               |
| <b>Cuff-duplicate</b> | <b>6</b>  | <b>41</b> | <b>5</b>  | <b>4</b> | <b>0.883</b> | <b>0.0099</b>   |
| Tejas-ancestral       | 11        | 24        | 5         | 11       | -0.008       | 1               |
| Tejas-duplicate       | 17        | 69        | 1         | 2        | 0.507        | 0.496           |
| Mael-ancestral        | 8         | 28        | 4         | 4        | 0.714        | 0.1846          |
| <b>Mael-duplicate</b> | <b>4</b>  | <b>31</b> | <b>2</b>  | <b>1</b> | <b>0.935</b> | <b>0.0592</b>   |
| Vret-ancestral        | 18        | 35        | 16        | 27       | 0.132        | 0.831           |
| <b>Vret-duplicate</b> | <b>25</b> | <b>68</b> | <b>8</b>  | <b>7</b> | <b>0.665</b> | <b>0.069</b>    |
| Ago2b                 | 41        | 53        | 2         | 6        | -1.321       | 0.4621          |
| Ago2c                 | 2         | 34        | 0         | 5        | 0            | 0               |
| Ago2d                 | 27        | 44        | 2         | 8        | -1.455       | 0.318           |
| <b>Ago2e</b>          | <b>4</b>  | <b>19</b> | <b>13</b> | <b>2</b> | <b>0.968</b> | <b>0.000037</b> |

**Table 2 MK test result for larger pseudoobscura dataset Fuller et. al [31]**

| Gene                   | Ds        | Dn        | Ps        | Pn        | NI           | $\alpha$     | Fisher p-value  |
|------------------------|-----------|-----------|-----------|-----------|--------------|--------------|-----------------|
| <b>Armi</b>            | <b>33</b> | <b>71</b> | <b>36</b> | <b>38</b> | <b>0.491</b> | <b>0.509</b> | <b>0.02259</b>  |
| <b>Arx-ancestral</b>   | <b>2</b>  | <b>7</b>  | <b>14</b> | <b>4</b>  | <b>0.082</b> | <b>0.918</b> | <b>0.011</b>    |
| Arx-duplicate          | 3         | 5         | 14        | 11        | 0.471        | 0.529        | 0.438           |
| <b>Cuff-ancestral</b>  | <b>4</b>  | <b>29</b> | <b>18</b> | <b>16</b> | <b>0.123</b> | <b>0.877</b> | <b>0.000569</b> |
| <b>Cuff-duplicate</b>  | <b>6</b>  | <b>39</b> | <b>15</b> | <b>18</b> | <b>0.185</b> | <b>0.815</b> | <b>0.002</b>    |
| Tejas-ancestral        | 12        | 23        | 11        | 28        | 1.328        | -0.328       | 0.62            |
| <b>Tejas-duplicate</b> | <b>14</b> | <b>67</b> | <b>16</b> | <b>23</b> | <b>0.3</b>   | <b>0.7</b>   | <b>0.0069</b>   |
| Mael-ancestral         | 8         | 27        | 7         | 22        | 0.724        | 0.276        | 0.568           |
| <b>Mael-duplicate</b>  | <b>4</b>  | <b>28</b> | <b>11</b> | <b>15</b> | <b>0.195</b> | <b>0.805</b> | <b>0.015</b>    |
| Vret-ancestral         | 17        | 33        | 44        | 85        | 0.995        | 0.005        | 1               |
| <b>Vret-duplicate</b>  | <b>25</b> | <b>65</b> | <b>25</b> | <b>27</b> | <b>0.415</b> | <b>0.585</b> | <b>0.018</b>    |

**Table 3 MK test from DGRP Freeze 1 Dataset (*D. melanogaster* - *D. simulans*)**

| Gene        | Ds        | Dn        | Ps        | Pn       | NI           | $\alpha$     | Fisher p-value |
|-------------|-----------|-----------|-----------|----------|--------------|--------------|----------------|
| <b>Arx</b>  | <b>9</b>  | <b>3</b>  | <b>3</b>  | <b>3</b> | <b>0</b>     | <b>0.333</b> | <b>0.04</b>    |
| Ago2        | 53        | 100       | 1         | 4        | 2.12         | -1.12        | 0.66           |
| Tejas       | 35        | 87        | 4         | 20       | 2.011        | -1.011       | 0.314          |
| Mael        | 22        | 36        | 4         | 5        | 0.764        | 0.236        | 0.72           |
| <b>Armi</b> | <b>54</b> | <b>64</b> | <b>17</b> | <b>6</b> | <b>0.298</b> | <b>0.702</b> | <b>0.02</b>    |
| Vret        | 45        | 30        | 13        | 17       | 1.962        | -0.962       | 0.134          |
| Cuff        | 33        | 62        | 5         | 5        | 0.532        | 0.468        | 0.49           |
